# Supplementary material for: Upper gut heat shock proteins HSP70 and GRP78 promote insulin resistance, hyperglycemia, and non-alcoholic steatohepatitis
Source: PubMed Central journal article supplement (PMC9748124; doi:10.1038/s41467-022-35310-5), 2022-12-13
Supplement: 41467_2022_35310_MOESM1_ESM.pdf [file 41467_2022_35310_MOESM1_ESM.pdf]

## SUPPLEMENTARY INFORMATION

### Upper gut heat shock proteins HSP70 and GRP78 promote insulin resistance, hyperglycemia, and non-alcoholic steatohepatitis

<sup>1,2</sup>Giulia Angelini, <sup>3</sup>Lidia Castagneto-Gissey, <sup>4</sup>Serenella Salinari, <sup>5</sup>Alessandro Bertuzzi, <sup>1</sup>Danila Anello,  
<sup>6</sup>Meenakshi Pradhan, <sup>7,8</sup>Marlen Zschätzsch, <sup>9</sup>Paul Ritter, <sup>10</sup>Carel W. Le Roux, <sup>11</sup>Francesco Rubino,  
<sup>3</sup>Nicola Basso, <sup>3</sup>Giovanni Casella, <sup>12,13</sup>Stefan R. Bornstein\*, <sup>6</sup>Valentina Tremaroli\*,  
<sup>1,2,13</sup>Geltrude Mingrone\*

#### Affiliations:

<sup>1</sup>Università Cattolica del Sacro Cuore, Rome, Italy

<sup>2</sup>Fondazione Policlinico Universitario A. Gemelli IRCCS, Rome, Italy

<sup>3</sup>Department of Surgical Sciences, Sapienza University of Rome, Rome, Italy

<sup>4</sup> Department of Computer, Control, and Management Engineering “Antonio Ruberti”, University of Rome “Sapienza”, Rome, Italy

<sup>5</sup>CNR-Institute of Systems Analysis and Computer Science (IASI), Rome, Italy

<sup>6</sup>Wallenberg Laboratory for Cardiovascular and Metabolic Research, Department of Molecular and Clinical Medicine, University of Gothenburg, Gothenburg, Sweden.

<sup>7</sup>Institute of Natural Materials Technology, Faculty of Mechanical Science and Engineering, Technischen Universität Dresden, Dresden, Germany

<sup>8</sup>Biotopa gGmbH, Dresden, Germany

<sup>9</sup>Bruker Daltonics SPR, Hamburg, Germany

<sup>10</sup>Diabetes Complications Research Centre, Conway Institute, University College Dublin, Dublin, Ireland.

<sup>11</sup>Bariatric and Metabolic Surgery; King’s College Hospital, London UK

<sup>12</sup>Department of Medicine III, Universitätsklinikum Carl Gustav Carus an der Technischen Universität Dresden, Dresden, Germany

<sup>13</sup>Division of Diabetes & Nutritional Sciences, School of Cardiovascular and Metabolic Medicine & Sciences, King’s College London, London, United Kingdom

\*These Authors jointly supervised this work

## SUPPLEMENTARY RESULTS

### *Validation of mAb binding to native serum HSP70 or GRP78*

Amino acid sequences of HSP70 and GRP78 are shown in the Supplementary Fig.S3A,B using the one letter code and numbers indicating amino acid positions, where the part in light blue highlights the amino acids sequence of the epitope recognized by the respective monoclonal antibodies (mAbs).

HSP70 (Clone 3A3) mAb recognizes the region located between amino acids 504-617 of HSP70, while GRP78 (Clone 76-E6) mAb recognizes the region located between amino acids 497 and 581.

We aimed to ascertain whether commercial mAbs recognize native epitopes of HSP70 or GRP78 and thus measured the affinity constants of these antibodies for the respective native serum proteins by a combination of strategies including Surface Plasmon Resonance (SPR) and co-immunoprecipitation assay. In fact, for physiological studies, it is imperative that mAbs recognize the target protein in its native conformation.

We wanted to ascertain that mAbs used in our study recognized native epitopes of HSP70 or GRP78 and thus we measured the affinity constant of these antibodies for the respective native serum proteins by SPR using covalently attached mAbs to a dextran sensor surface.

Supplementary Fig.S3C,D shows the fitting curves from independent experiments where various dilutions of HFD rat serum with known concentrations of native proteins by ELISA was titrated with a fixed concentration of anti-HSP70 or anti-GRP78 mAbs.

The equilibrium dissociation constant, ( $KD=kd/ka$ ) was  $0.71 \times 10^{-9}$  M for anti-HSP70 and  $0.58 \times 10^{-9}$  M for anti-GRP78 mAbs. This indicates that antibodies are of high affinity with sensitivity in picomolar range.

The interaction between mAbs and HSP70 or GRP78 was further confirmed by the immunoprecipitation and immunoblotting assays.

To validate mAb specificity, each mAb was separately incubated with a serum sample containing 13.42 ng of HSP70 and 3.08 ng of GRP78 enabling the antibody to bind the respective serum protein. The antibody/antigen complex was then pulled out of the sample using magnetic beads coated with anti-mouse IgG antibody. Western blot SDS-PAGE shows that the mAbs tested were highly specific (Supplementary Fig.S3E,F) since native HSPs were no more detectable after co-immunoprecipitation.

The validation assay, carried out in triplicate, demonstrated, in fact, that Santa Cruz mAb detected HSP70 at the  $70\pm 0.8$  kDa and  $70\pm 4$  kDa band position with recombinant and endogenous proteins, respectively, and this conformed with the expected mass of 70 kDa, as indicated in the manufacturer's technical data sheet. Specific mAb from Santa Cruz detected GRP78 at molecular weight positions of  $78\pm 0.7$  and  $78\pm 0.5$  kDa for recombinant protein and serum protein, respectively. This is in close agreement with the reported 78-kDa molecular mass.

To exclude that mAbs were able to bind similar antigenic sites on different proteins, we performed cross-reactivity studies on a serum depleted of either HSP70 or GRP78. After immunoprecipitating HSP70 from serum using its specific antibody, we found that mAb against GRP78 did not cross-react with HSP70 in the precipitate (Supplementary Fig.S3G).

Similarly, after GRP78 immunoprecipitation, mAb against HSP70 was unable to detect GRP78 in the immune precipitate (Supplementary Fig.S3H).

### Rat Primary Myotubes

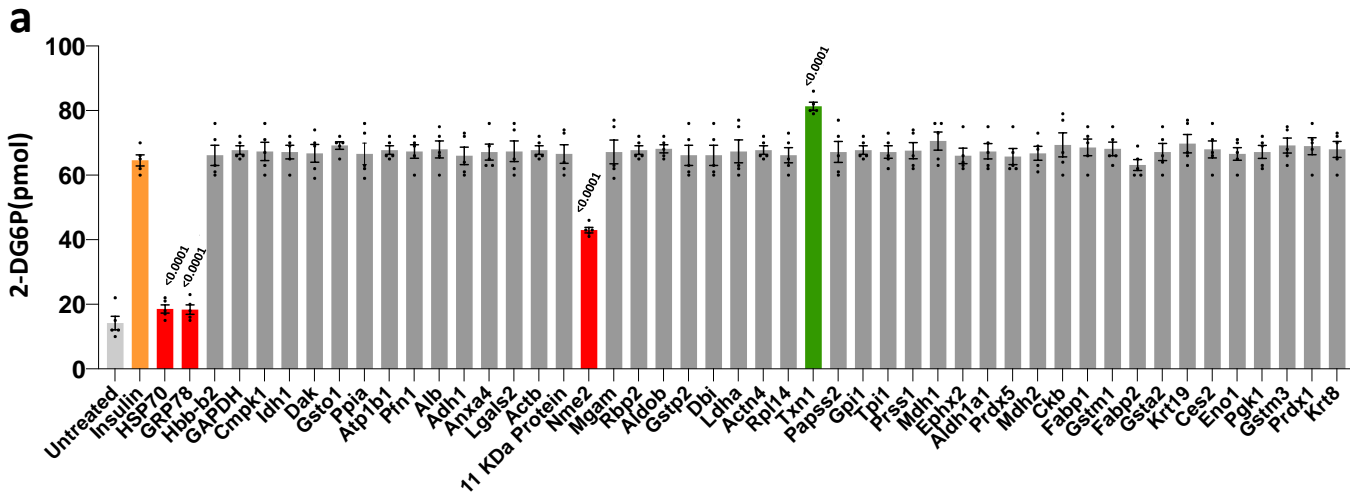

### Gut Mucosa

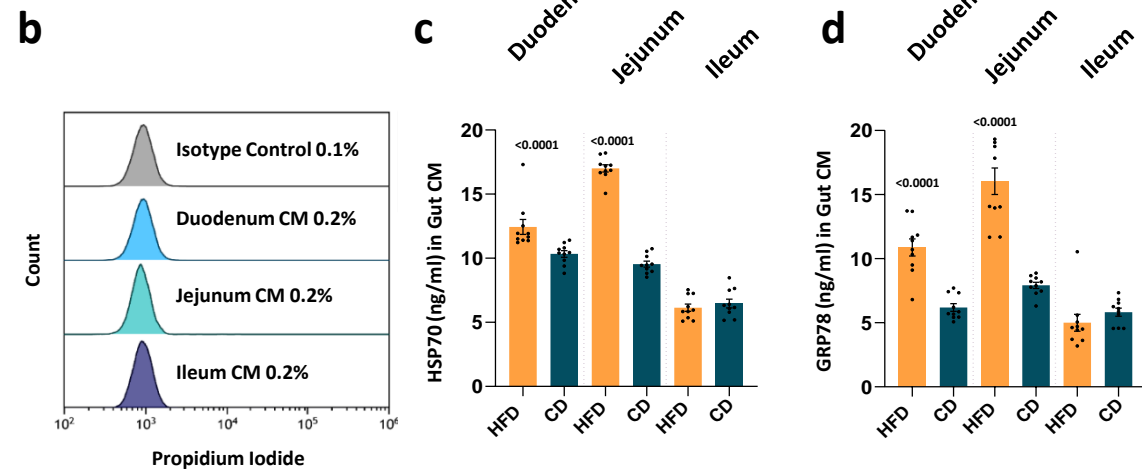

### Jejunum

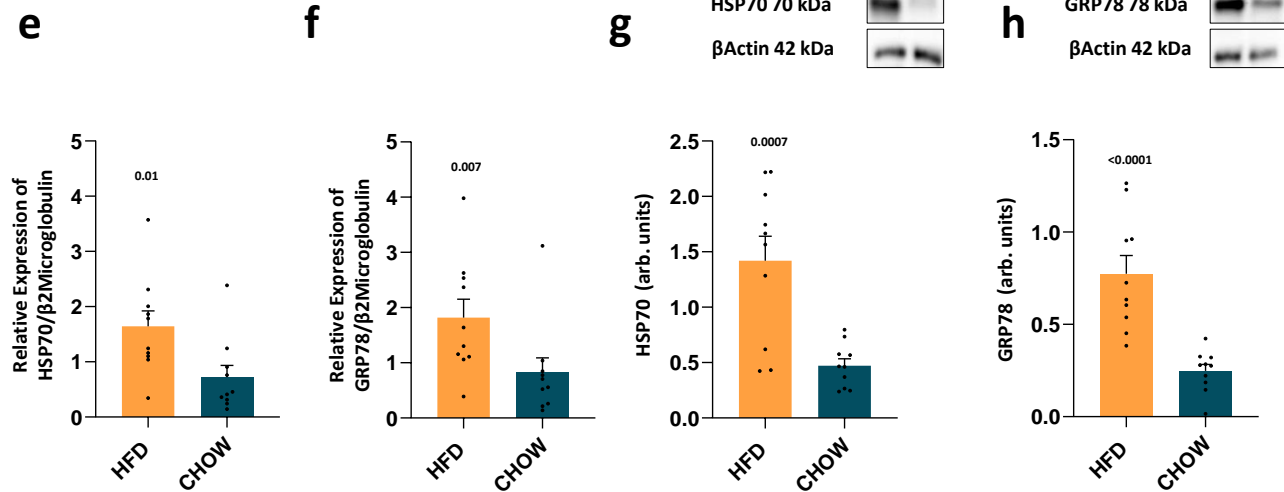

### Serum

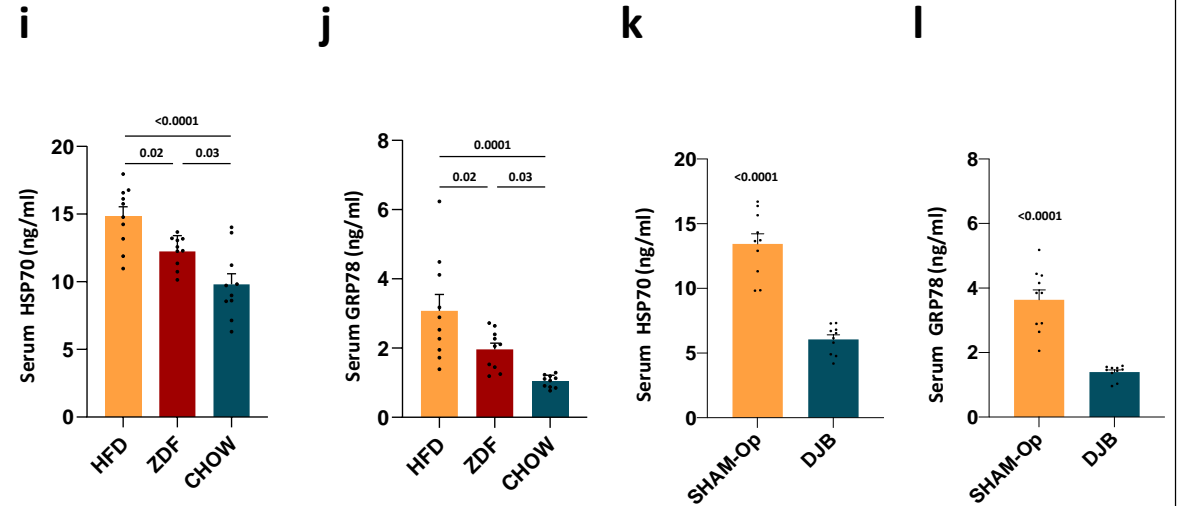

## Figure S1.

**a**, In vitro glucose uptake in rat primary myocytes stimulated with insulin (100 nM) and recombinant proteins (n= 5 biologically independent experiments; most effective concentration selected see Methods). **b**, Flow cytometry-based analysis of intestinal mucosa cell death using propidium iodide staining (n= 5 biologically independent animals). **c,d** In vitro study of the secretion of HSP70 (c) and GRP78 (d) in the conditioned medium (CM) from duodenum, jejunum and ileum in rats fed chow (CD) or high fat diet (HFD) (n= 5 biologically independent animals). **e-h** Intestinal (Jejunum) gene (e,f) and protein (g,h) expression of HSP70 and GRP78 in rats fed a CD or HFD (n= 5 biologically independent animals). **i,j**, Serum concentration of HSP70 (e) and GRP78 (f) in rats under HFD, CD and Zucker Diabetic Fatty (ZDF) rats (n= 5 biologically independent animals). **k,l** Serum concentration of HSP70 (g) and GRP78 (h) in rats that underwent sham-operation (Sham-op) or Duodenal-jejunal Bypass (DJB) (n= 5 biologically independent animals). Data are presented as mean value  $\pm$  SEM. Statistical significances were calculated by unpaired two-tailed *t*-test, two-tailed Mann–Whitney test and One-way Anova with Bonferroni's correction for multiple comparisons, where appropriate. Source data are provided as a Source Data file.

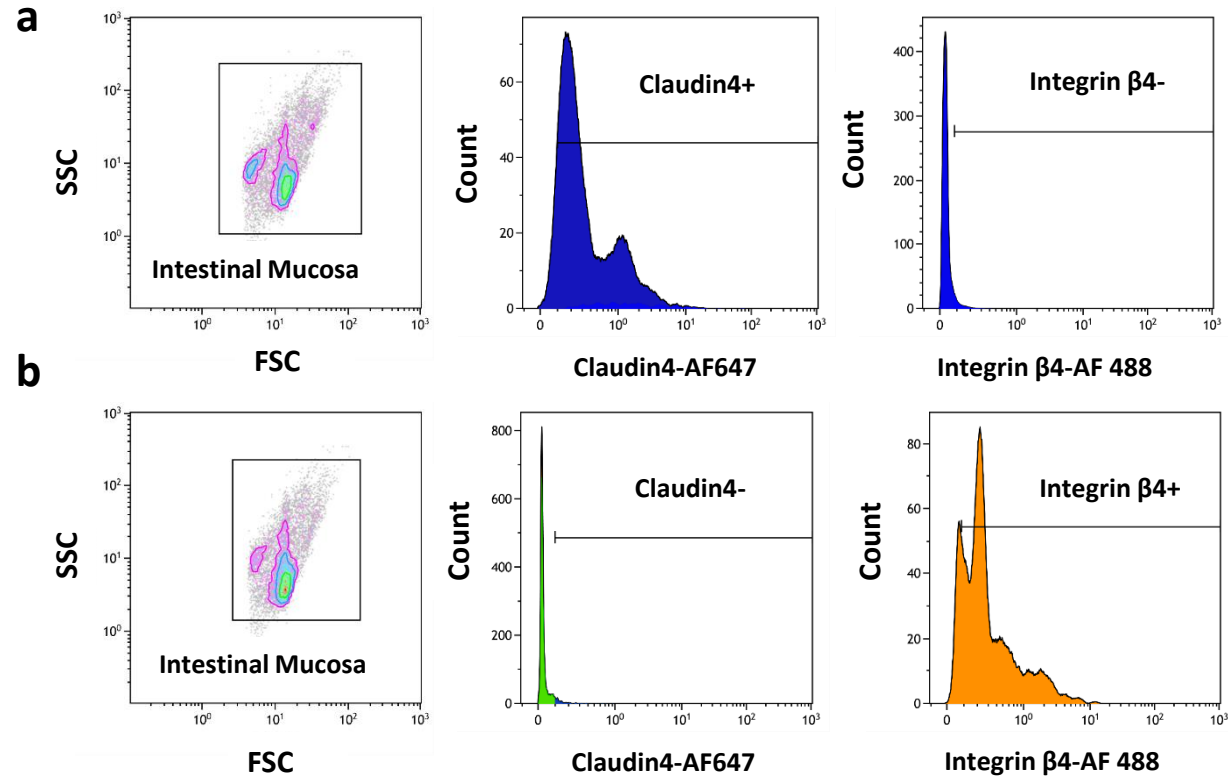

**Figure S2.**

**a,b**, Representative image of post-sorting analysis (n= 5 biologically independent animals). After sorting, enteroendocrine cells (a) purity was >90% as shown by the high expression of Claudin-4 and marginal expression of Integrin- $\beta$ 4, while, intestinal epithelial cells (b) purity was >85% since the large majority of cells expressed Integrin- $\beta$ 4.

**a** **HSP70 (3A3) mAb**

```

10      20      30      40      50
MAKAAAIGID LGTTYSCVGV FQHGKVEIIA NDQGNRTTPS YVAFDTTERL
60      70      80      90     100
IGDAAKNQVA LNPQNTVFDA KRLIGRKFGD PVVQSDMKHW PFQVINDGDK
110     120     130     140     150
PKVQVSYKGE TKAFYPPEIS SMVLTKMKEI AEAYLGYPVT NAVITVPAYF
160     170     180     190     200
NDSQRQATKD AGVIAGLNVL RIINEPTAAA IAYGLDRTGK GERNVLIFDL
210     220     230     240     250
GGGTFDVSIL TIDDGIFEVK ATAGDTHLGG EDFDNRLVNH FVEEFKRKHK
260     270     280     290     300
KDISQNKRAV RRLRTACERA KRTLSSSTQA SLEIDSLFEG IDFYTSITRA
310     320     330     340     350
RFEEELCSDLF RSTLEPVEKA LRDAKLDKAQ IHDLVLVGGG TRIPKVQKLL
360     370     380     390     400
QDFFNGRDLN KSINPDFAVA YGAAVQAAIL MGDKSENVQD LLLLDVAPLS
410     420     430     440     450
LGLTAGGVVM TALIKRNSTI PTKQTQIFTT YSDNQPGVLI QVYEGERAMT
460     470     480     490     500
KDNLLGRFE LSGIPPAPRG VPQIEVTFDI DANGILNVTA TDKSTGKANK
510     520     530     540     550
ITITNDKGRLLSKEEIERMVQEAEKYKAEDVQRRERSAKNALESYAFNMK
560     570     580     590     600
SAVEDEGLKGIKISEADKKVLDKCQEVISWLDANTLAEKDEFEHKKRKELE
610     620     630     640
QVCNPIISGLYQGAGGPGPGFGAAGPKGGSGSGPTIEEV D

```

**b** **GRP78 (76-E6) mAb**

```

10      20      30      40      50
MMKFTVVAAL LLLLGAVRAE EEDKKEDVGT VVGIDLGTTY SCVGVFKNGR
60      70      80      90     100
VEIIANDQGN RITPSYVAFT PEGERLIGDA AKNQLTSNPE NTVFDKRLI
110     120     130     140     150
GRTWNPSPVQ QDIKFLPFKV VEKKTkPYIQ VDIGGGQTKT FAPPEISAMV
160     170     180     190     200
LTKMKETAEA YLGKKVTHAV VVVPAYFNDA QRQATKDAGT IAGLNVMRII
210     220     230     240     250
NEPTAAAIAY GLDKREGEKN ILVFDLGGGT FDSVLLTIDN GVFEVVATNG
260     270     280     290     300
DTHLGGEDFD QRVMEHFIKL YKKKTGKDVR KDNRAVQKLR REVEKAKRAL
310     320     330     340     350
SSQHQAIEI ESFFEGEDFS ETLTRAKFEE LNMDLFRSTM KPVQKVLEDS
360     370     380     390     400
DLKKSIDEI VLVGGSTRIP KIQLLVKEFF NGKEPSRGIN PDEAVAYGAA
410     420     430     440     450
VQAGVLSGDQ DTGDLVLLDV CPLTLGIETV GGVMTKLIPR NTVVPTKKSQ
460     470     480     490     500
IFSTASDNQP TVTIKVYEGE RPLTKDNHLL GTFDLTGIPP APRGVPQIEV
510     520     530     540     550
TFEIDVNGIL RVTAEKGTG NKNKTIITND QNRLTPEEIE RMVNDAEKFA
560     570     580     590     600
EEDKKIKERI DTRNELESYA YSLKNQIGDK EKLGGKLSSE DKETMEKAVE
610     620     630     640
EKIEWLESHQ DADIEDFKAK KKELEEIVQP IISKLYGSGG PPPTGEEDTS
EKDEL

```

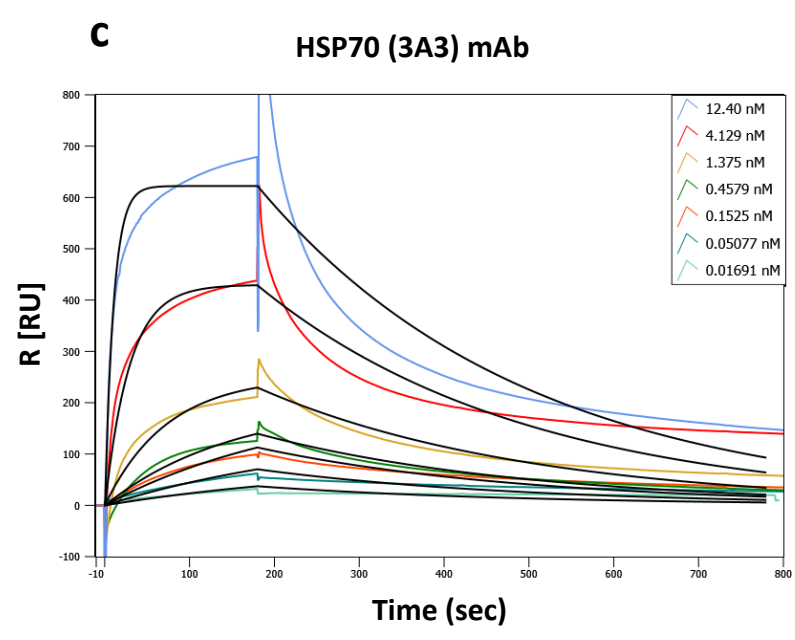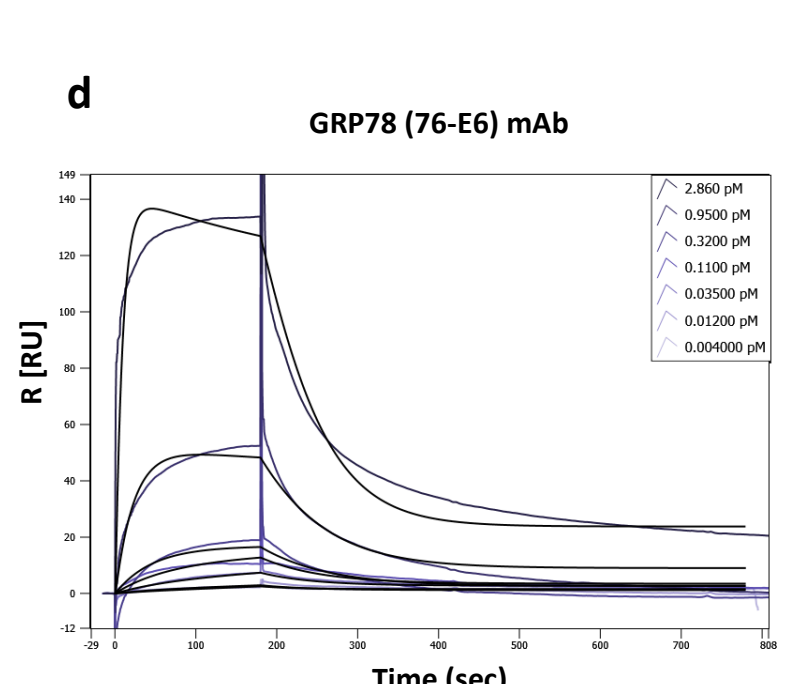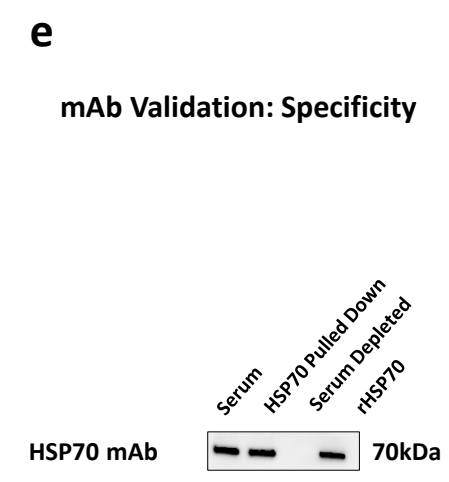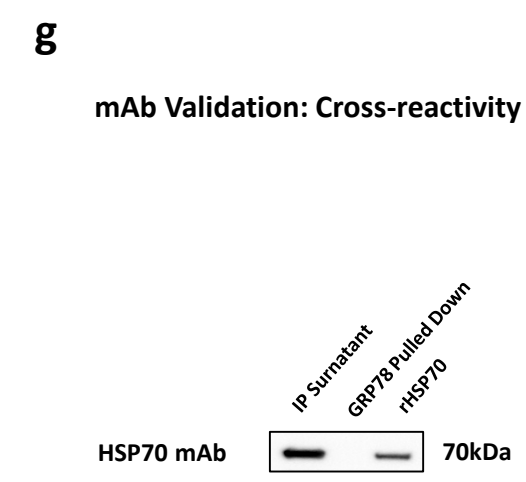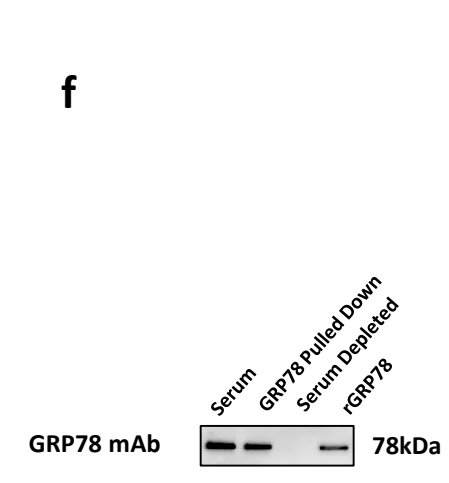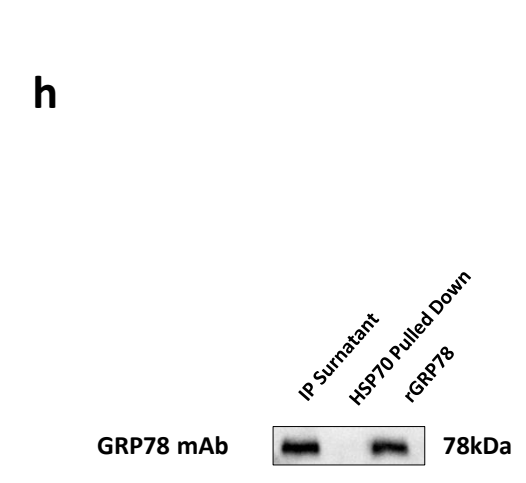



**Figure S3.**

**a,b,** Amino acid sequence of HSP70 (a) and GRP78 (b) using the one letter code and numbers indicating amino acid positions; the part in light blue highlights the amino acids sequence of the epitope recognized by the respective monoclonal antibodies (mAbs). HSP70 (Clone 3A3) mAb recognizes the region located between amino acids 504-617 of HSP70, while GRP78 (Clone 76-E6) mAb recognizes the region located between amino acids 497 and 581. **c,d,** Sensorgram of Surface Plasmon Resonance evaluating the binding affinity between mAbs against HSP70 (c) or GRP78 (d) to serum HSP70 and GRP78. **e-h,** Antibodies specificity (e,f) and cross- reactivity (g,h) validation by co-immunoprecipitation and Western Blot. N=5 independent experiments.

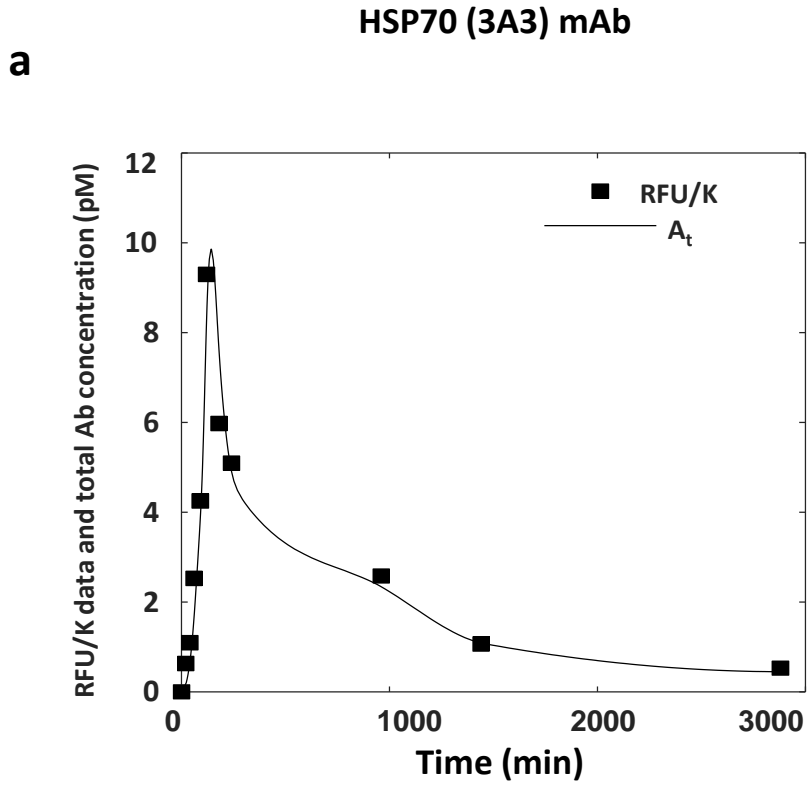

$V = 0.044$  (l)  
 $\bar{P} = 211$  (pM)  
 $K = 1.38$  (pM<sup>-1</sup>)  
 $K_{SS} = 752$  (10<sup>-12</sup> M)  
 $k_e = 0.055$  (h<sup>-1</sup>)  
 $k_{int} = 0.057$  (h<sup>-1</sup>)

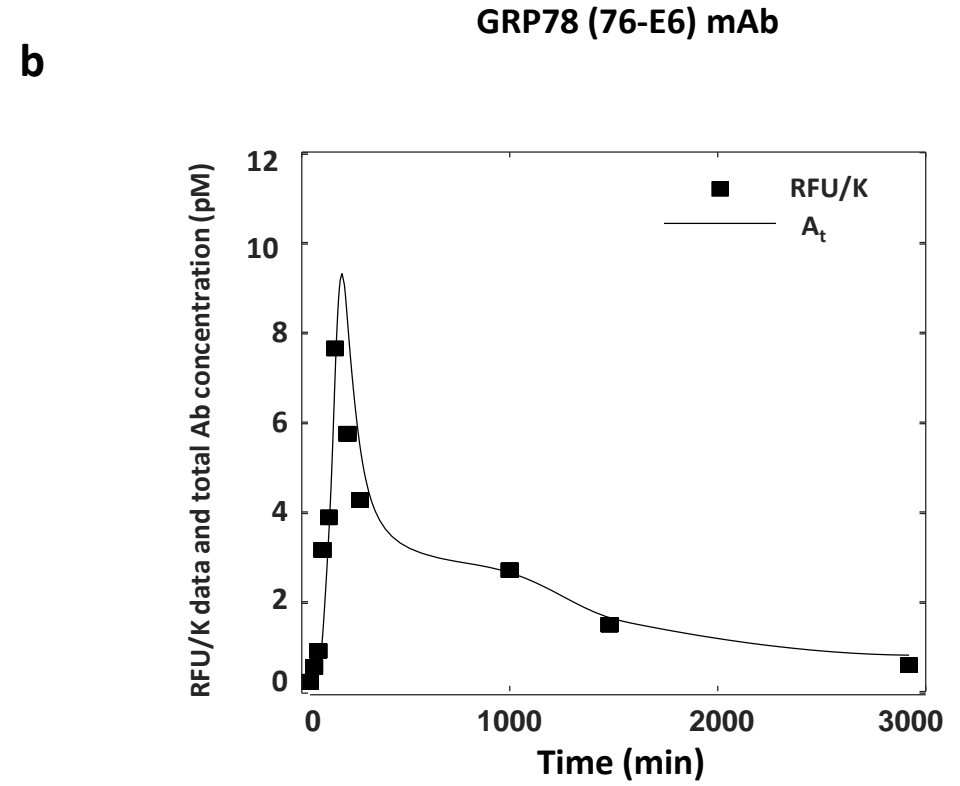

$V = 0.051$  (l)  
 $\bar{P} = 42.1$  (pM)  
 $K = 1.63$  (pM<sup>-1</sup>)  
 $K_{SS} = 608$  (10<sup>-12</sup> M)  
 $k_e = 0.018$  (h<sup>-1</sup>)  
 $k_{int} = 0.017$  (h<sup>-1</sup>)

#### Figure S4.

Time-course of the Relative Fluorescent Units (RFU) of mAbs against HSP70 (a) and GRP78 (b). RFU is represented by filled squares, while the model fitting is represented by a continuous line. The model fitting provides the mAb concentration in pM.  $V$  (l) is the mAb distribution volume.  $\bar{P}$  (pM) is the free HSP serum concentration.  $K$  ( $\text{pM}^{-1}$ ) is a constant proportional to mAb total concentration.  $K_{SS}$  ( $10^{-12}$  M) is the quasi-steady state dissociation constant of the mAb-HSP complex. The elimination of mAb from serum is represented by  $k_e$  ( $\text{h}^{-1}$ ). Finally, the mAb internalization into tissues is represented by the constant rate  $k_{int}$  ( $\text{h}^{-1}$ ).

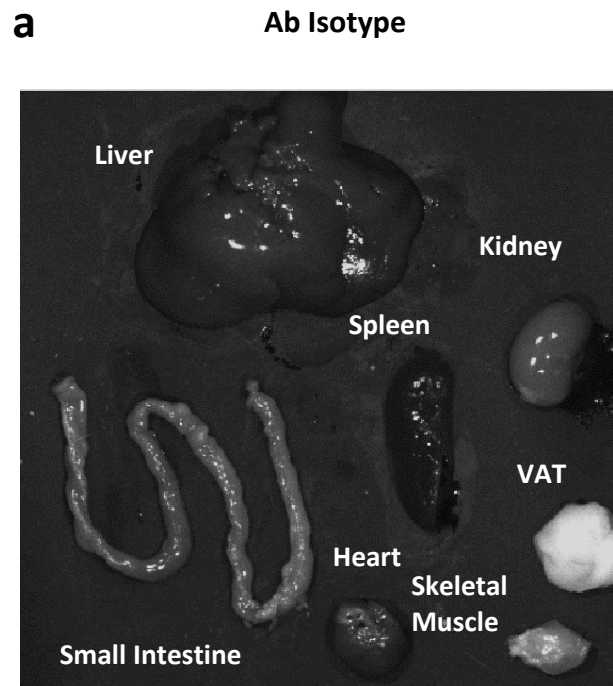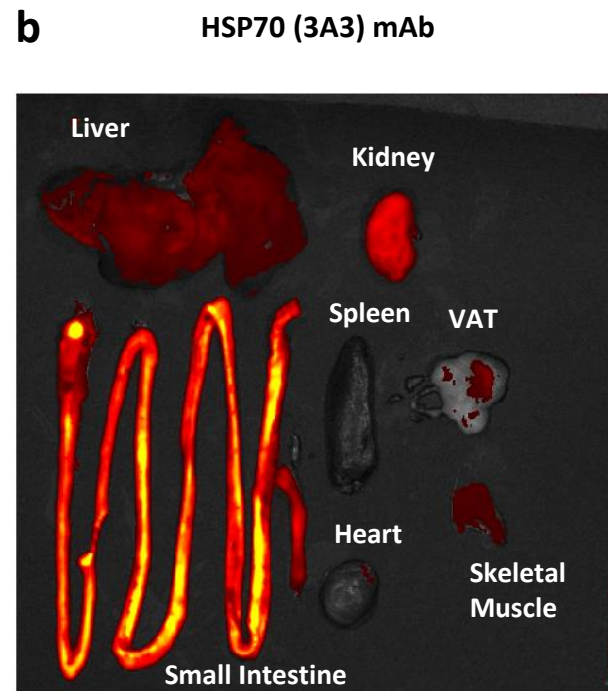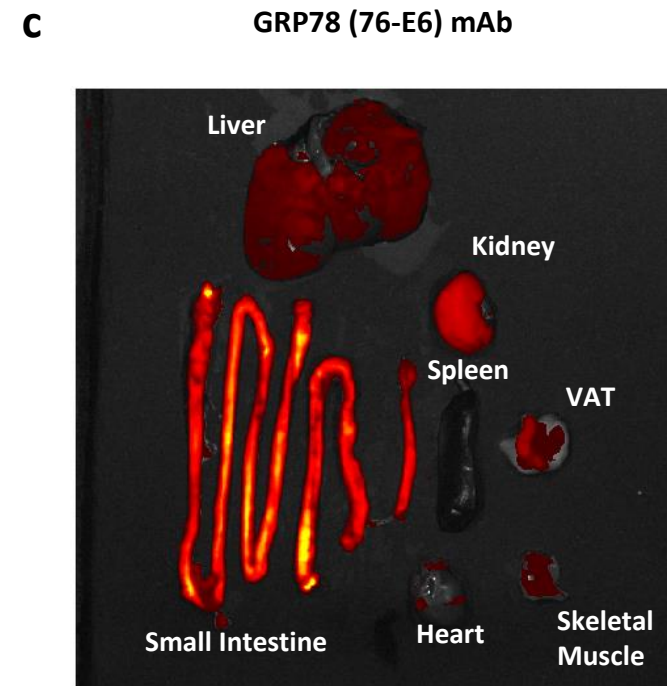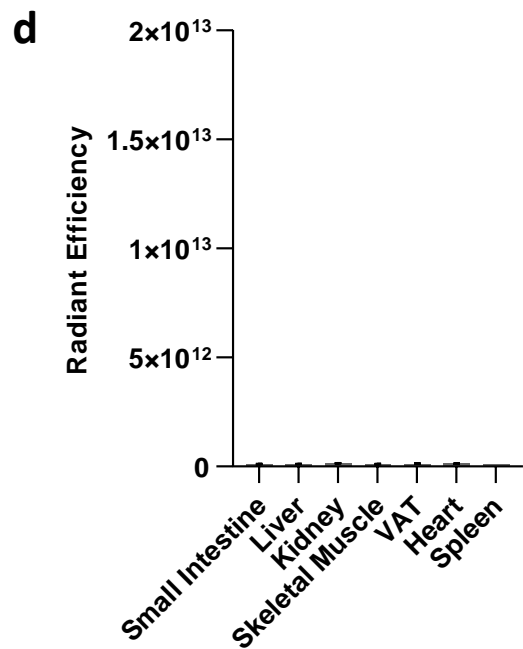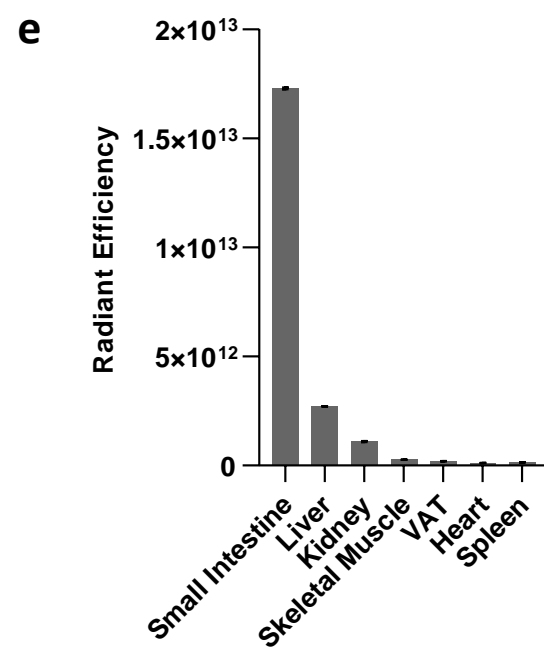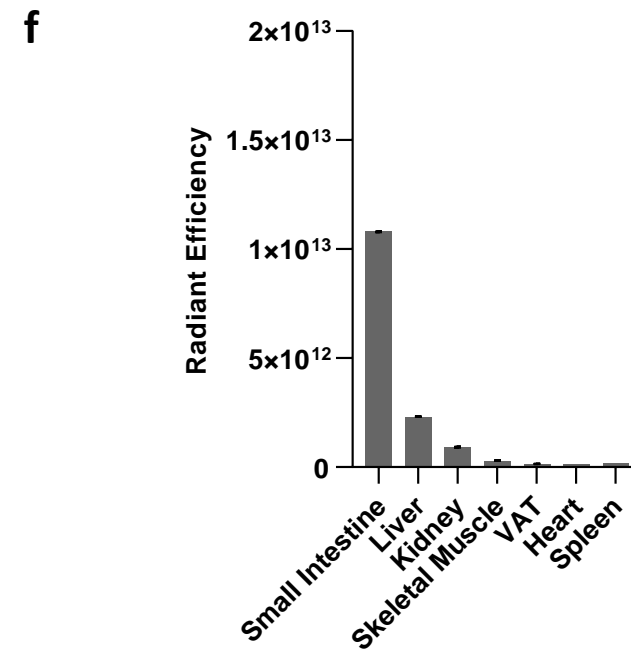

**Figure S5.**

**a-c**, Representative *ex vivo* images of dissected organs 2 hours after the injection (1 µg/ml) of fluorescent Ab isotype (a) or mAbs against HSP70 (b) or GRP78 (c). **c,d**, Radiant efficiency of the tissues after the infusion with Ab isotype (d) or mAbs against HSP70 (e) or GRP78 (f). Data are presented as mean value  $\pm$  SEM of n= 5 biologically independent animals. Source data are provided as a Source Data file.

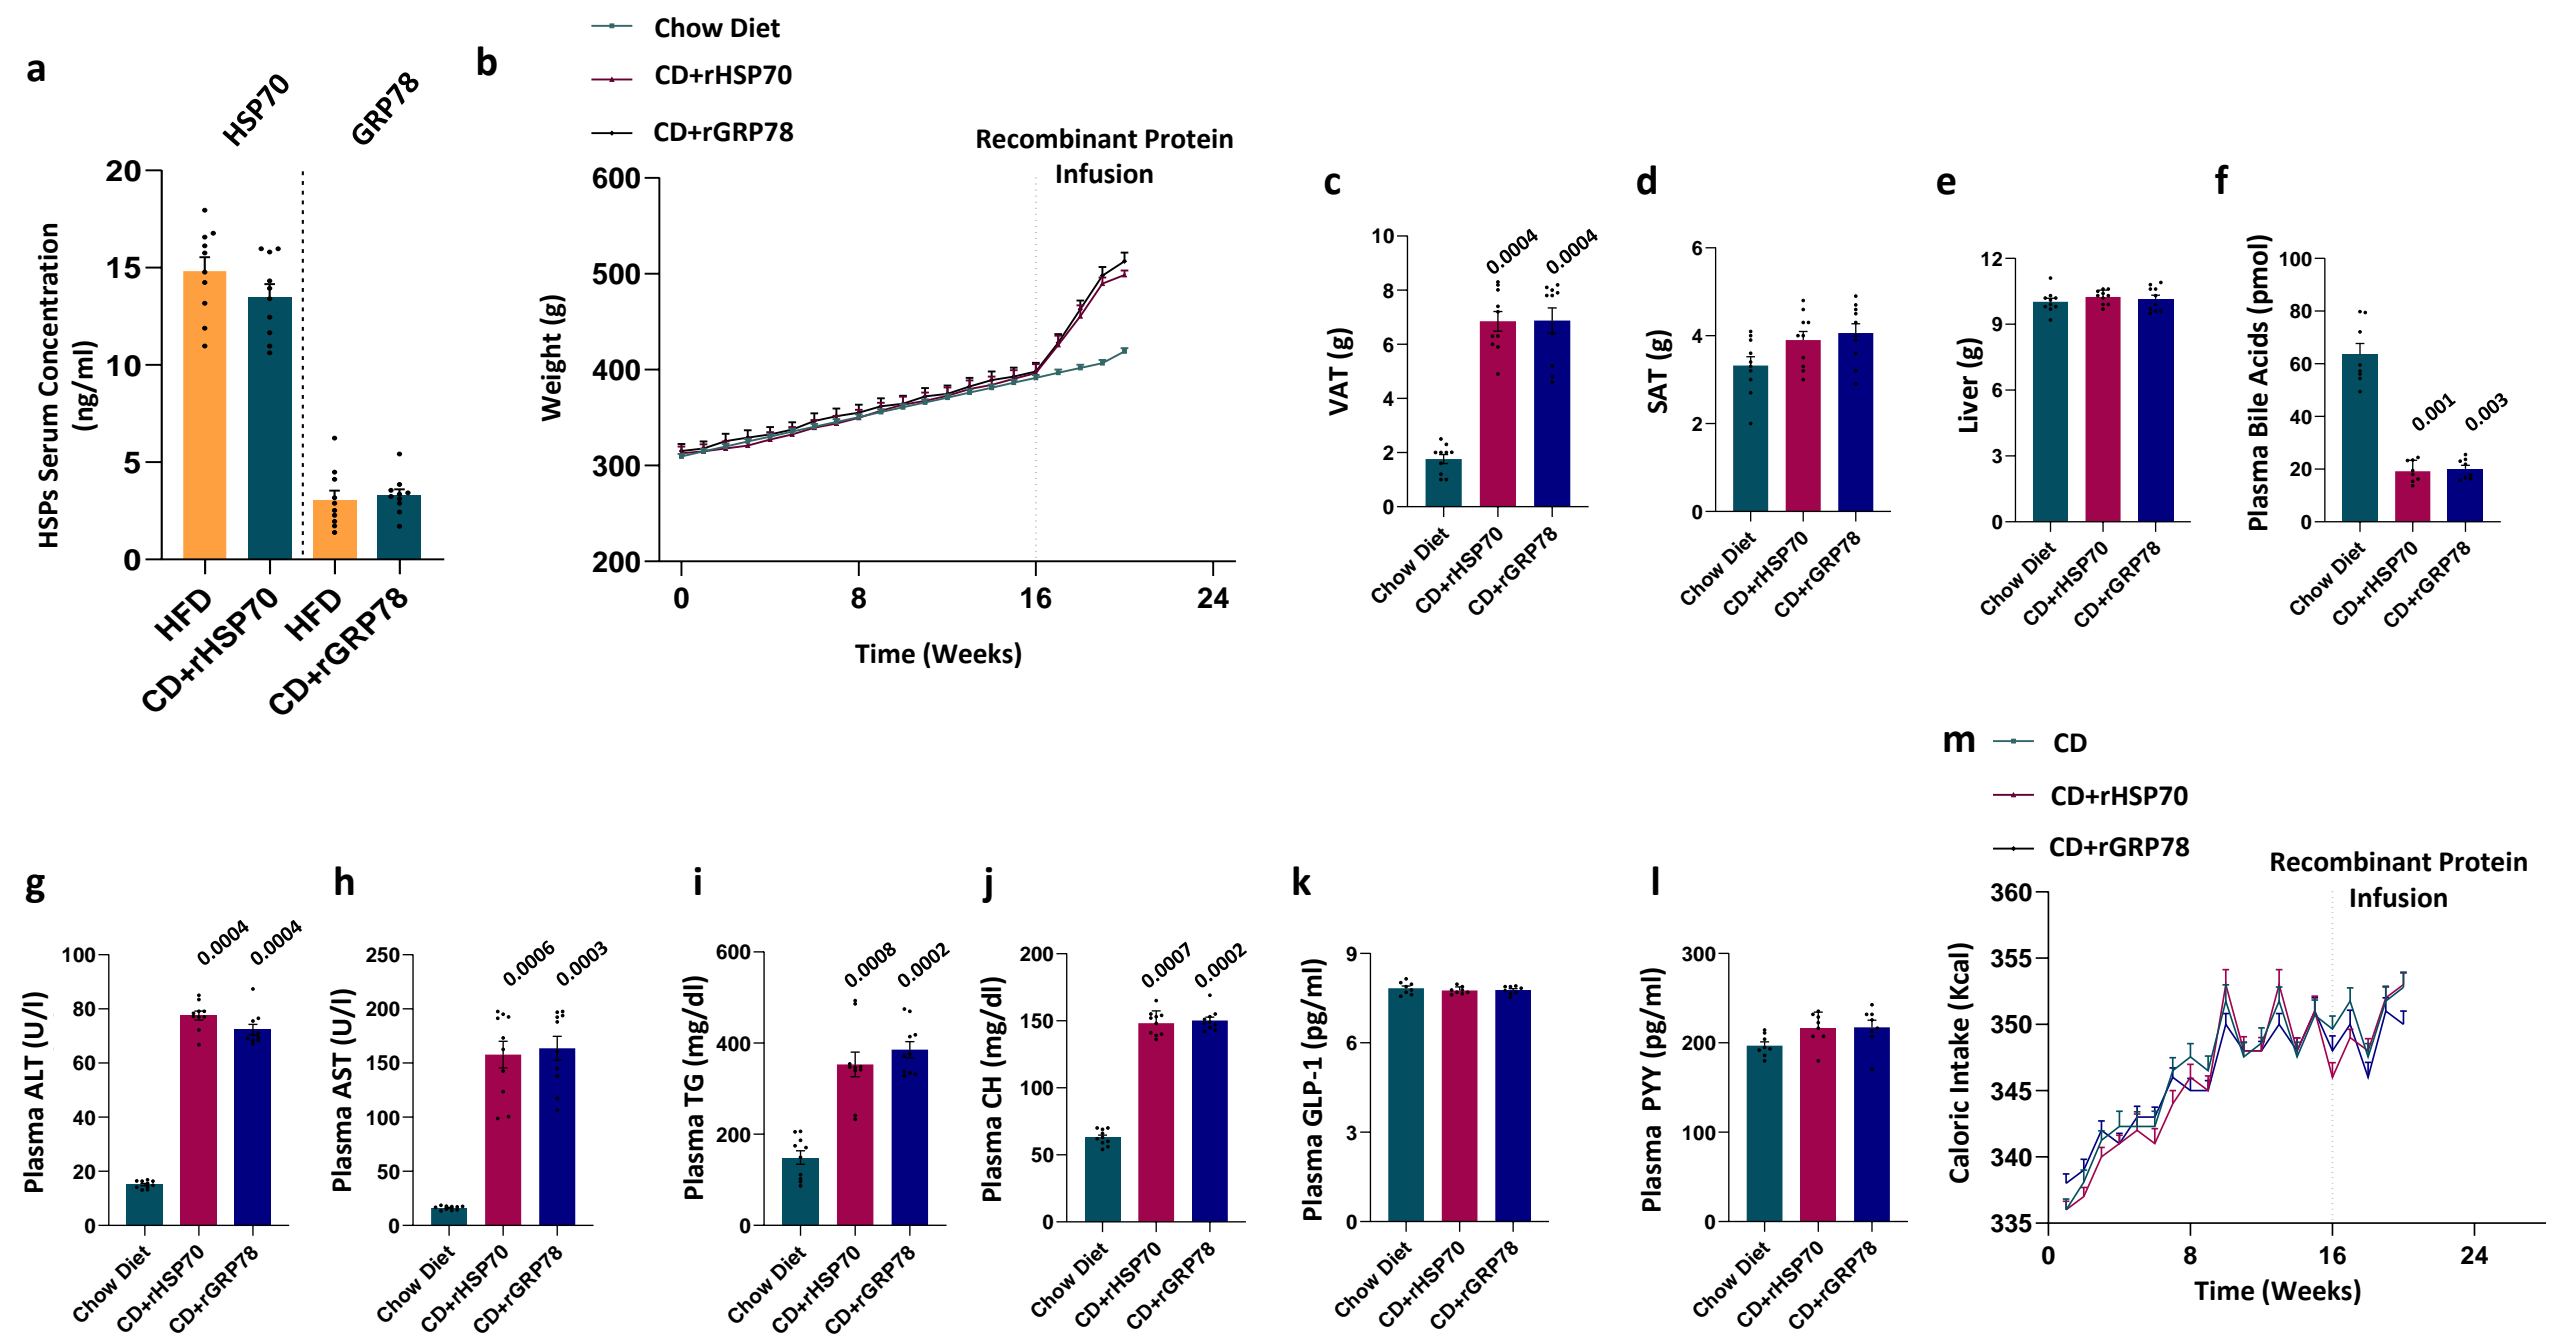

## Figure S6.

**a**, Serum concentration of HSP70 and GRP78 in rats under chow diet in combination with continuous infusion of recombinant HSP70 or GRP78. **b**, Average body weight time course; the dotted line represents the time when the osmotic pumps were implanted to infuse recombinant HSP70 or GRP78 or saline solution. **c-e**, Body composition; weight of visceral adipose tissue (VAT) (c), subcutaneous adipose tissue (SAT) (d) and liver (e). **f-l**, Plasma levels of total Bile Acids (f), Alanine aminotransferase (ALT) (g), Aspartate aminotransferase (AST) (h), Triglycerides (TG) (i), Cholesterol (CH) (j), Glucagon-like peptide-1 (GLP-1) (k) and Peptide YY (PYY) (l) in rats fed a chow diet (CD) and infused with recombinant HSP70 or GRP78 or saline solution. **m**, Time course of caloric intake; the dotted line represents the time when the osmotic pumps were implanted to infuse recombinant HSP70 or GRP78 or saline solution. Data are mean $\pm$ SEM from n=10 biologically independent animals. Statistical significances were calculated by Kruskal–Wallis test with Dunnett’s correction for multiple comparisons. Source data are provided as a Source Data file.

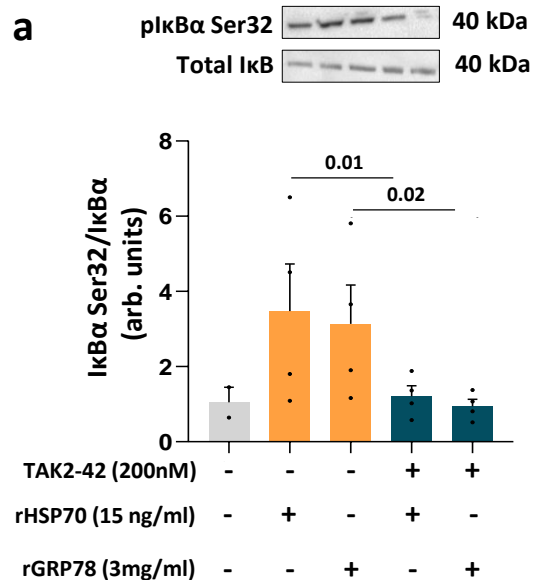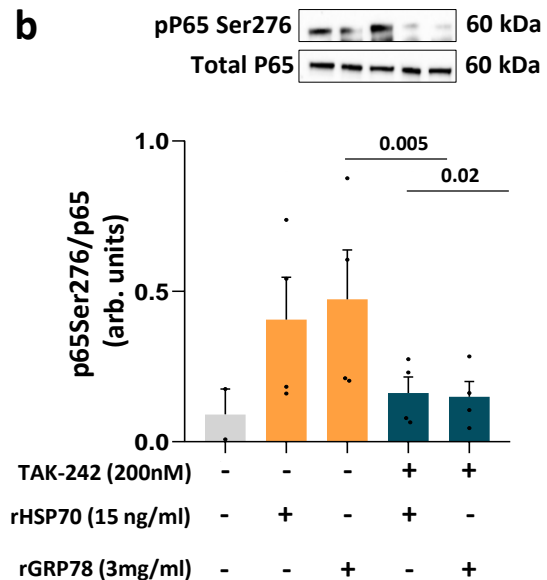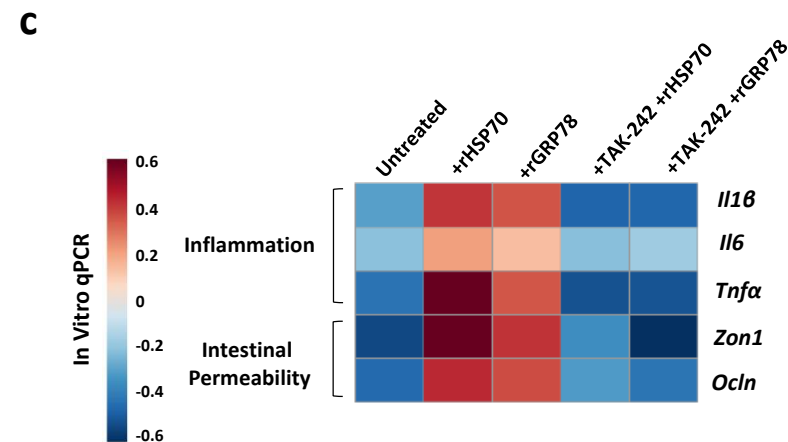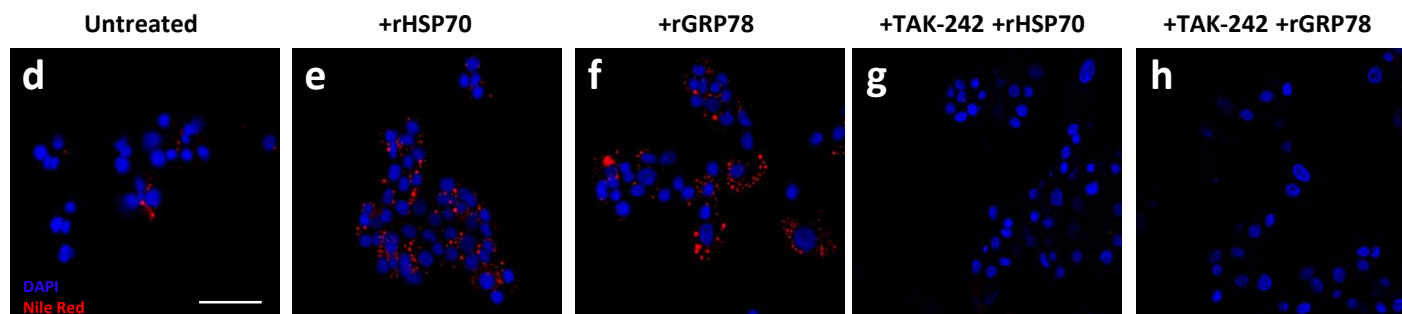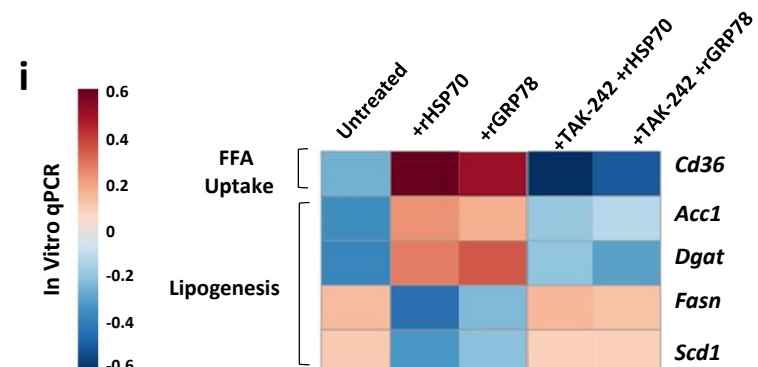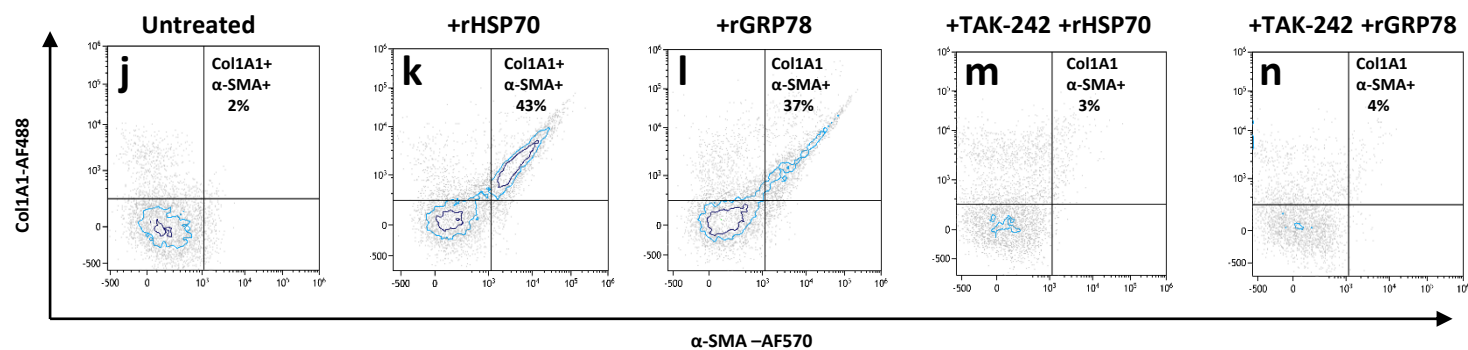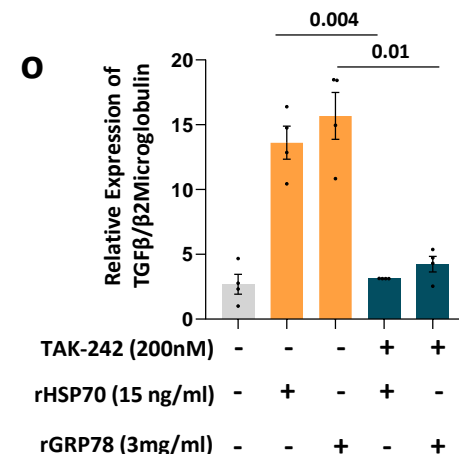



**Figure S7.**

**a,b**, Intestinal (rat primary colon epithelial cells) phosphorylation of phospho-inhibitory subunit of NF- $\kappa$ B alpha (pI $\kappa$ B $\alpha$ ) on Ser32 and Nuclear factor NF-kappa-B p65 subunit (p65) on Ser276 in the presence of recombinant heat-shock proteins (15 ng/ml of HSP70 and 3 ng/ml of GRP78) and in the presence or absence of TLR4 inhibitor, TAK-242 (200nM). **c**, Gene expression of intestinal (rat primary colon epithelial cells) inflammatory markers as well as key regulators of intestinal permeability. **d-h**, Nile red staining of primary rat hepatocytes incubated with recombinant heat-shock proteins (15 ng/ml of HSP70 and 3 ng/ml of GRP78) and in the presence or absence of TAK-242 (200nM). **i**, Gene expression of free-fatty acid transporter CD36 and key enzymes involved in hepatic de novo lipogenesis. **j-n**, Flow cytometry of myofibroblastic differentiation of rat primary hepatic stellate cells treated with recombinant heat-shock proteins (15 ng/ml of HSP70 and 3 ng/ml of GRP78) and in the presence or absence of TLR4 inhibitor, TAK- 242 (200nM). **o**, Gene expression of Tumor growth factor  $\beta$  (TGF- $\beta$ ) in rat primary hepatic stellate cells treated with recombinant HSP70 (15 ng/ml) or GRP78 (3 ng/ml) and in the presence or absence of TAK-242 (200nM). Magnification 40X. Scale bar: 50  $\mu$ m. Data are mean  $\pm$  SEM of n=4 independent experiments. Statistical significances were calculated by paired two-tailed *t*-test. Source data are provided as a Source Data file.

**a** Rat primary hepatocytes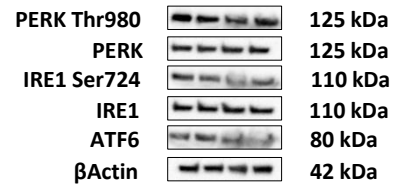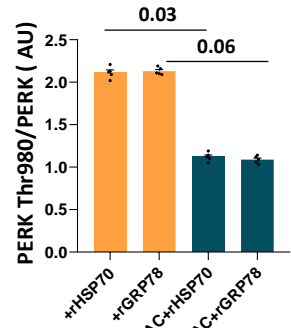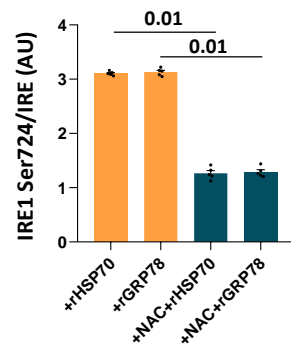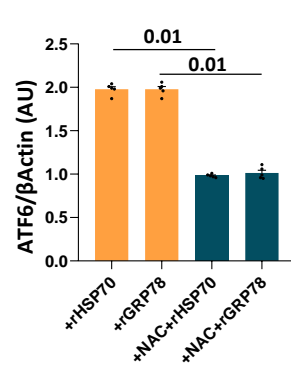**b** Rat primary hepatic stellate cells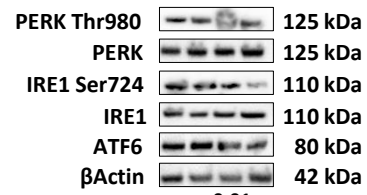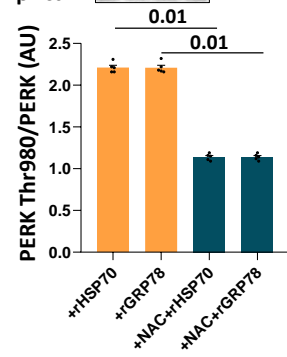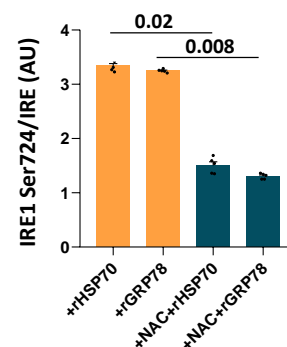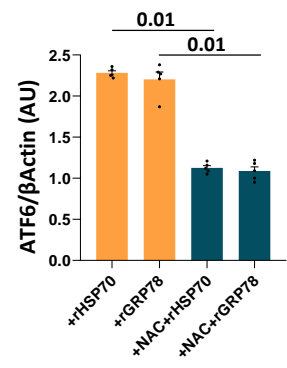**c** Rat primary myocytes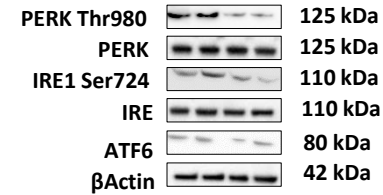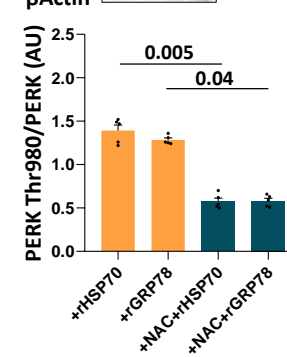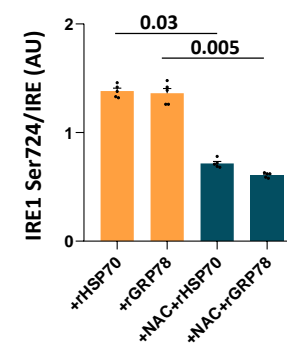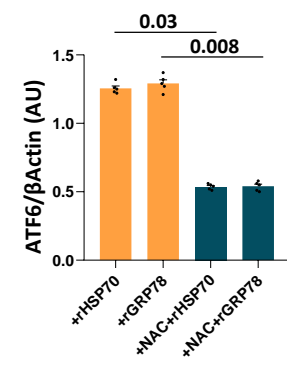**d** Rat primary hepatocytes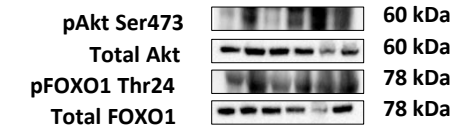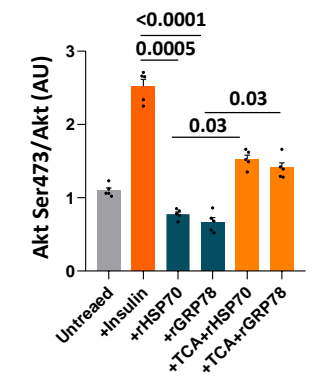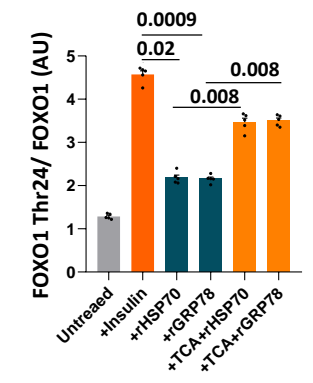**e** Rat primary myocytes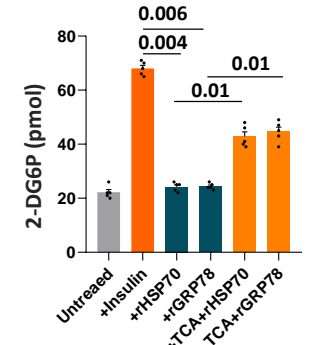

**Figure S8.**

**a-c**, Western Blot analysis of key proteins involved in Unfolded Protein Response (UPR). Rat primary hepatocytes (a), rat primary hepatic stellate cells (b) and rat primary myocytes (c) were treated with recombinant heat-shock proteins (15 ng/ml of HSP70 and 3 ng/ml of GRP78), in the presence or absence of N-acetyl cysteine (NAC) (50 $\mu$ M). **d**, Western Blot analysis of insulin mediated Akt Ser473 and Foxo1 Thr24 phosphorylation in rat primary hepatocytes treated with recombinant heat-shock proteins (15 ng/ml of HSP70 and 3 ng/ml of GRP78), in the presence or absence of Taurocholate (TCA) (1 mM). Hepatocytes were stimulated with 100nM insulin for 10 minutes. **e**, Insulin mediated glucose uptake of rat primary myocytes treated with HSP70 (15 ng/ml), GRP78 (3ng/ml) alone or in combination with Taurocholate (1 mM). Myocyte were stimulated with 100nM insulin for 10 minutes. Data are mean  $\pm$  SEM of n=4 independent experiments. Statistical significances were calculated by Kruskal–Wallis test with Dunnett’s correction for multiple comparisons. Source data are provided as a Source Data file.

**a**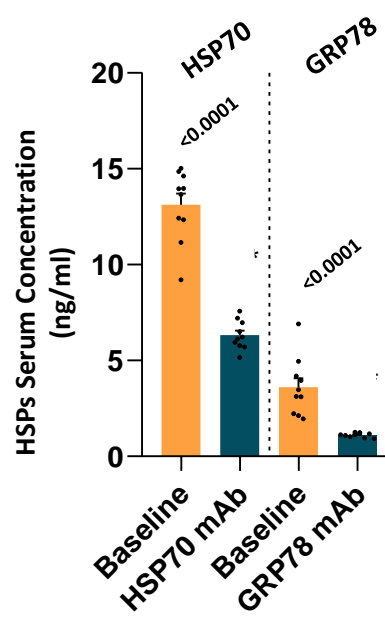**b**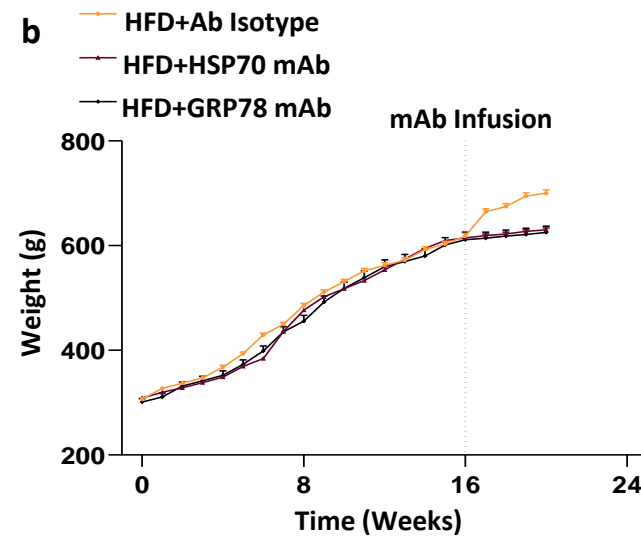**c**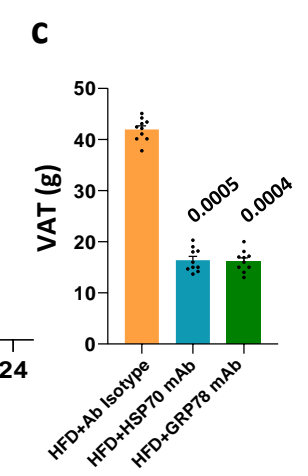**d**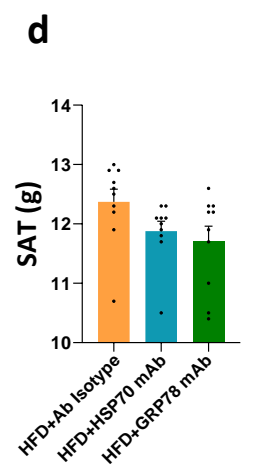**e**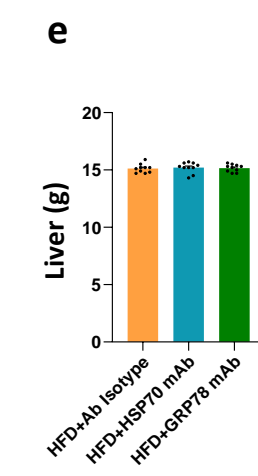**f**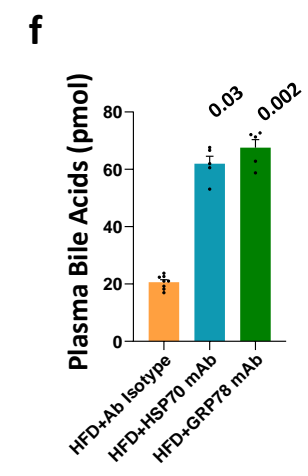**g**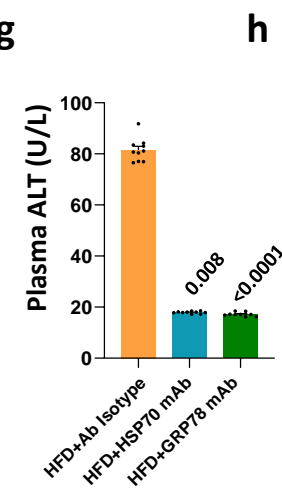**h**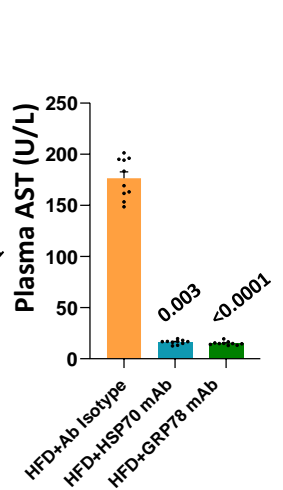**i**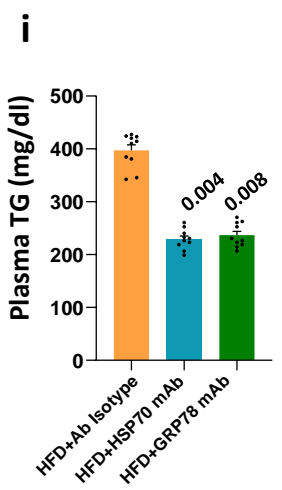**j**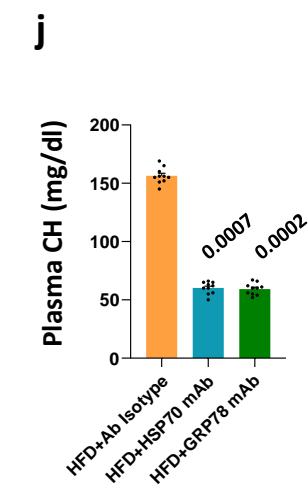**k**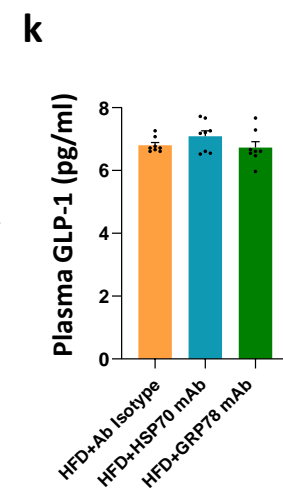**l**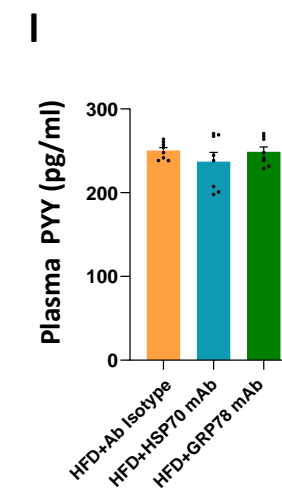**m**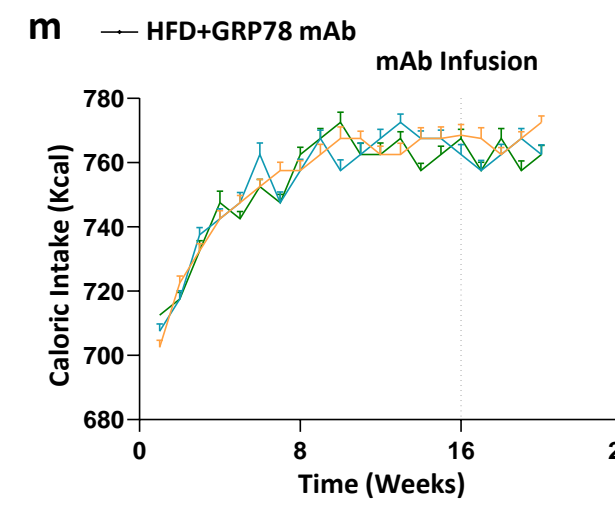

**Figure S9.**

**a**, Serum concentrations of HSP70 and GRP78 at baseline and following mAbs infusion. **b**, Average body weight time-course; the dotted line represents the time when the osmotic pumps were implanted to infuse mAbs against HSP70 or GRP78 or Ab Isotype. **c-e**, Body composition; weight of visceral adipose tissue (VAT) (c), subcutaneous adipose tissue (SAT) (d), liver weight (e). **f-l**, Plasma levels of total Bile Acids (f), Alanine aminotransferase (ALT) (g), Aspartate aminotransferase (AST) (h), Triglycerides (TG) (i), Cholesterol (CH) (j), Glucagon-like peptide-1 (GLP-1) (k) and Peptide YY (PYY) (l) in rats fed a high fat diet (HFD) and infused with mAbs against HSP70 or GRP78 or Ab Isotype. **l**, Time course of caloric intake; the dotted line represents the time when the osmotic pumps were implanted to infuse mAbs against HSP70 or GRP78 or Ab Isotype. Data are mean  $\pm$  SEM from n=10 biologically independent animals. Statistical significances were calculated by Kruskal–Wallis test with Dunnett’s correction for multiple comparisons and two-tailed Mann–Whitney test. Source data are provided as a Source Data file.



**Figure S10.**

**a**, Average body weight time course; the dotted line represents the time when surgery was performed and when the osmotic pumps were implanted to infuse recombinant HSP70 or GRP78 or saline solution. **b-d**, Weight of visceral adipose tissue (VAT) (b), subcutaneous adipose tissue (SAT) (c), liver weight (d). **e-k**, Plasma levels of total Bile Acids (e) Alanine aminotransferase (ALT) (f), Aspartate aminotransferase (AST) (g), Triglycerides (TG) (h), Cholesterol (CH) (i), Glucagon-like peptide-1 (GLP-1) (j) and Peptide YY (PYY) (k) in rats after sham-operation (Sham-Op) or duodenal jejunal bypass (DJB) and infused with recombinant HSP70 or GRP78 or saline solution. **l**, Time course of caloric intake; the dotted line represents the time when surgery was performed and when the osmotic pumps were implanted to infuse recombinant HSP70 or GRP78 or saline solution. Data are mean $\pm$ SEM of n=10 biologically independent animals. Statistical significances were calculated by Kruskal–Wallis test with Dunnett’s correction for multiple comparisons. Source data are provided as a Source Data file.

**a**

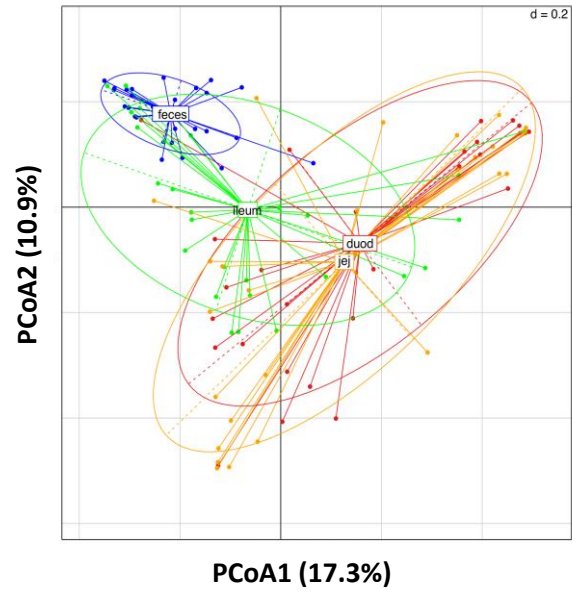

**b**

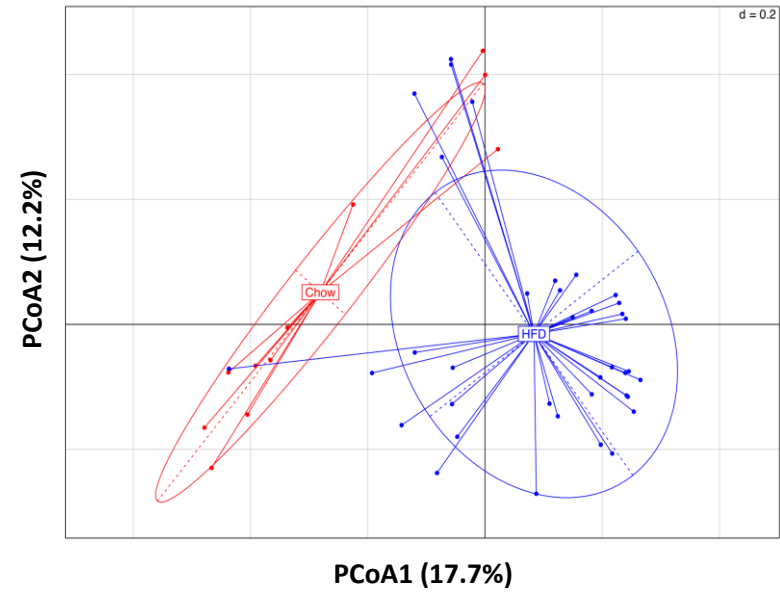

**c**

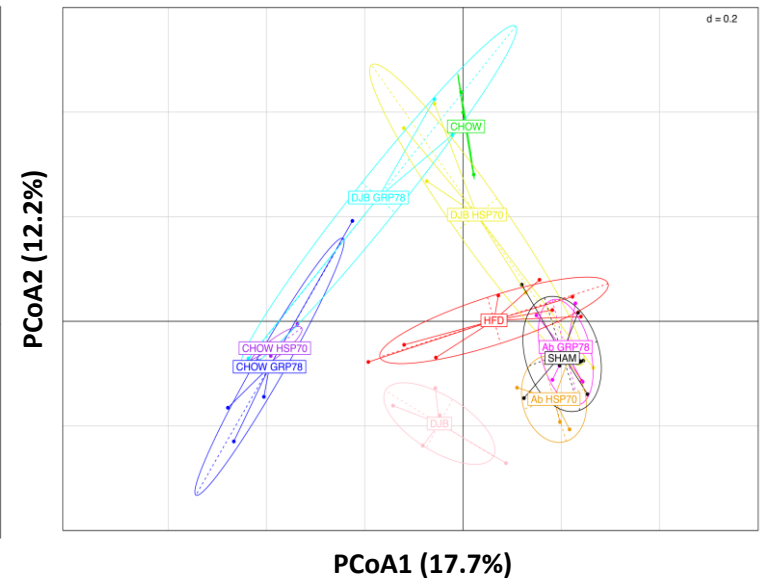



**Figure S11.**

**a**, Principal component analysis (PCoA) on the Bray-Curtis dissimilarity index calculated for gut microbiota profiles of amplicon sequence variants (ASVs). Small intestinal (duod, duodenum, n=20; jej, jejunum, n=17; ile, ileum, n=27) and fecal samples (n=48) were added in this analysis. **b**, PCoA on the Bray-Curtis dissimilarity index calculated for fecal microbiota profiles of amplicon sequence variants (ASVs) colored by diet (Chow, n=11; HFD, n=37) and **c**, colored by group (Chow, n=3; Chow+rHSP70, n=4; Chow+rGRP78, n=4; HFD, n=8; HFD+AbHSP70, n=4; HFD+AbGRP78, n=5; Sham, n=7; DJB, n=5; DJB+rHSP70, n=5; DJB+rGRP78, n=3). The numbers in brackets next to the axes indicate the amount of compositional variation explained by each PCo.

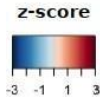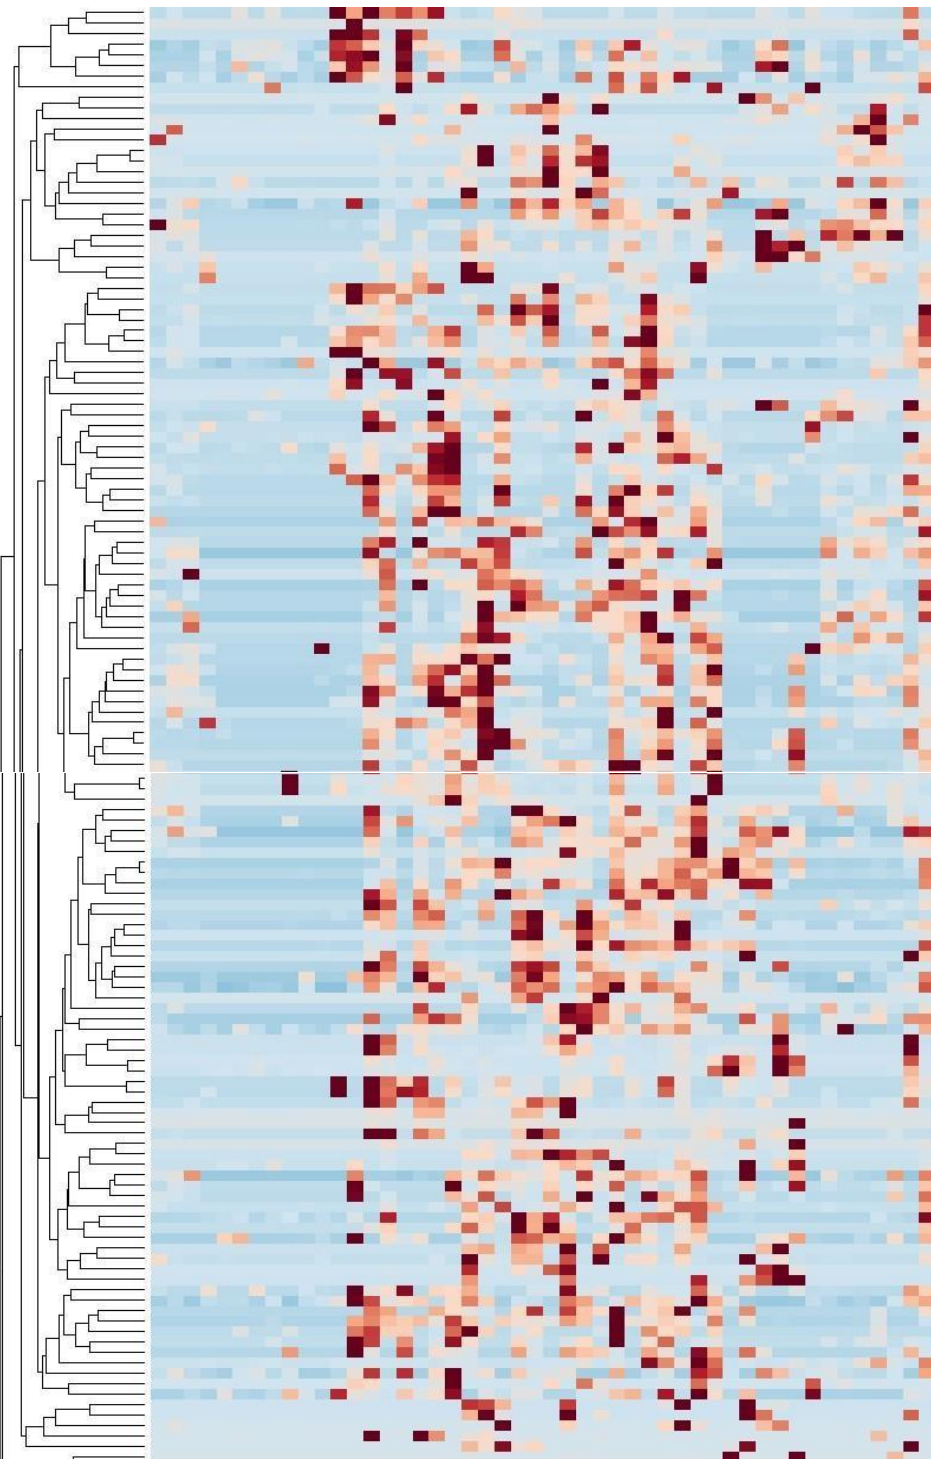

- GCA-90006675\_ASV\_2897
- Lachnospiraceae\_NK4A136\_group\_ASV\_0061
- Roseburia\_ASV\_3034
- Collidextribacter\_ASV\_1145
- Collidextribacter\_ASV\_1139
- Collidextribacter\_ASV\_1138
- Collidextribacter\_ASV\_1136
- Lachnospiraceae\_NK4A136\_group\_ASV\_0040
- Lachnospiraceae\_NK4A136\_group\_ASV\_0040
- Pseudoflavonifractor\_ASV\_1225
- Lachnospira\_ASV\_0864
- Holdemanna\_ASV\_0929
- Helicobacter\_ASV\_0551
- Christensenellaceae\_R-7\_group\_ASV\_1030
- Christensenellaceae\_R-7\_group\_ASV\_1029
- Blastia\_ASV\_3106
- Collinella\_ASV\_0674
- Clostridium\_sensu\_stricto\_1\_ASV\_0660
- Candidatus\_Solitermus\_ASV\_2367
- Pyromonadaceae\_ASV\_2940
- Christensenellaceae\_R-7\_group\_ASV\_1021
- Prevotellaceae\_UCG-003\_ASV\_1868
- Alitipes\_ASV\_1530
- Prevotellaceae\_Ga6A1\_group\_ASV\_1872
- Sulfarella\_ASV\_0504
- Sulfarella\_ASV\_0503
- Lachnospiraceae\_NK4A136\_group\_ASV\_3467
- UCG-005\_ASV\_1458
- UCG-005\_ASV\_1464
- UCG-005\_ASV\_1457
- Ruminococcus\_ASV\_2282
- Ruminococcus\_ASV\_2280
- Ruminococcus\_ASV\_2283
- Romboutsia\_ASV\_0206
- Agathobacter\_ASV\_2905
- Paludicola\_ASV\_2370
- Lachnospiraceae\_NK4A136\_group\_ASV\_0058
- Incertae\_Sedis\_ASV\_2543
- Incertae\_Sedis\_ASV\_2527
- Treponema\_ASV\_0610
- Lachnospiraceae\_NK4A136\_group\_ASV\_0114
- Oscillibacter\_ASV\_1325
- Desulfobivrio\_ASV\_0535
- Lachnospiraceae\_ASV\_3202
- Roseburia\_ASV\_2989
- Oscillibacter\_ASV\_1337
- Oscillibacter\_ASV\_1320
- Oscillibacter\_ASV\_1372
- DT1089\_ASV\_2480
- Candidatus\_Stoquelichus\_ASV\_0897
- Rikenellaceae\_RC9\_gut\_group\_ASV\_1549
- Oribacter\_ASV\_1480
- Rikenellaceae\_RC9\_gut\_group\_ASV\_1564
- UCG-005\_ASV\_1450
- Negishibacter\_ASV\_2454
- Family\_XIII\_AD011\_group\_ASV\_0303
- Christensenellaceae\_R-7\_group\_ASV\_1028
- Christensenellaceae\_R-7\_group\_ASV\_1036
- NK4A214\_group\_ASV\_1173
- CAG-873\_ASV\_1755
- Rikenellaceae\_RC9\_gut\_group\_ASV\_1558
- Bacteroides\_ASV\_1918
- Bacteroides\_ASV\_1915
- Silphila\_ASV\_0548
- Bacteroides\_ASV\_1909
- Bacteroides\_ASV\_1908
- Bacteroides\_ASV\_1911
- Alloprevotella\_ASV\_1864
- Butyrivimons\_ASV\_1475
- Butyrivimons\_ASV\_1474
- Bacteroides\_ASV\_1928
- Gemella\_ASV\_0826
- Alloprevotella\_ASV\_1855
- Alloprevotella\_ASV\_1854
- Prevotella\_ASV\_1610
- Collinella\_ASV\_0669
- Actinomyces\_ASV\_0638
- Actinomyces\_ASV\_0635
- Actinomyces\_ASV\_0634
- Peptostreptococcus\_ASV\_0202
- Bacteroides\_ASV\_1901
- Bacteroides\_ASV\_1899
- Bacteroides\_ASV\_1922
- Oscillibacter\_ASV\_1359
- Roseburia\_ASV\_2902
- Helicobacter\_ASV\_0560
- Clostridium\_sensu\_stricto\_1\_ASV\_0995
- Clostridium\_sensu\_stricto\_1\_ASV\_0991
- Romboutsia\_ASV\_0237
- Roseburia\_ASV\_3046
- Streptococcus\_ASV\_0794
- Enterohabditus\_ASV\_0728
- Romboutsia\_ASV\_0216
- Terrisporibacter\_ASV\_0249
- Corynebacterium\_ASV\_0646
- Streptococcus\_ASV\_0790
- DNF00800\_ASV\_0730
- Bacteroides\_ASV\_1895
- Bacteroides\_ASV\_1887
- Bacteroides\_ASV\_1878
- Bacteroides\_ASV\_1877
- Roseburia\_ASV\_2926
- Roseburia\_ASV\_2928
- Velloneia\_ASV\_1071
- Rodentibacter\_ASV\_0478
- Fuacobacterium\_ASV\_0949
- Velloneia\_ASV\_1070
- Lachnospiraceae\_ASV\_3186
- Lachnospiraceae\_ASV\_0017
- Anaerotruncus\_ASV\_2409
- Mogibacterium\_ASV\_0313
- Mogibacterium\_ASV\_0312
- Mogibacterium\_ASV\_0311
- Helicobacter\_ASV\_0550
- Oscillospira\_ASV\_1361
- Holdemanna\_ASV\_0935
- Lachnospiraceae\_ASV\_3208
- Alkibaculum\_ASV\_0921
- Alkibaculum\_ASV\_0920
- Elbacterium\_ASV\_0183
- Mariproteryanella\_ASV\_3158
- Streptococcus\_ASV\_0801
- Streptococcus\_ASV\_0799
- Agathobacter\_ASV\_2911
- Agathobacter\_ASV\_2905
- Roseburia\_ASV\_2992
- Agathobacter\_ASV\_2910
- Corynebacterium\_ASV\_0543
- Staphylococcus\_ASV\_0834
- Phascolarctobacterium\_ASV\_0762
- Lachnospiraceae\_NK4A136\_group\_ASV\_0112
- Lachnospiraceae\_NK4A136\_group\_ASV\_0075
- Olsenella\_ASV\_0732
- Bifidobacterium\_ASV\_0629
- Helicobacter\_ASV\_0556
- Mycoplasma\_ASV\_0951
- Lachnospira\_ASV\_0847
- Clostridium\_sensu\_stricto\_1\_ASV\_0979



**Figure S12.**

Heat map of prevalent differentially abundant amplicon sequence variants (ASVs) (FDR-adjusted p value < 0.05) present in at least 10% of the fecal samples and with taxonomic affiliation at least at genus level. The red-blue color scale indicates z-score normalized relative abundance. CD, n=3; CD+rHSP70, n=4; CD+rGRP78, n=4; HFD, n=8; HFD+AbHSP70, n=4; HFD+AbGRP78, n=5; Sham, n=7; DJB, n=5; DJB+rHSP70, n=5; DJB+rGRP78, n=3.



### Figure S13.

**a**, Distance-based redundancy analysis (db-RDA) for Bray-Curtis dissimilarity distances of amplicon sequence variants (ASVs) fecal microbiota profiles, metabolic/inflammatory variables and microbial taxa that best explain the variation of gut microbiota composition in fecal samples (CD, n=3; CD+rHSP70, n=4; CD+rGRP78, n=4; HFD, n=8; HFD+AbHSP70, n=4; HFD+AbGRP78, n=5; Sham, n=7; DJB, n=5; DJB+rHSP70, n=5; DJB+rGRP78, n=3). The statistical model constrained 21.8% of the compositional variation ( $p < 0.001$ ). Arrows indicate variables significantly correlated with variation of fecal microbiota composition. AST, aspartate aminotransferase; LPS, lipopolysaccharides; Glucose\_120min, blood glucose 120 minutes after oral glucose challenge; VAT, visceral adipose tissue; SAT, subcutaneous adipose tissue. Group is a categorical variable that indicates control and treated samples as: 1=Chow; 2=CD+rGRP78; 3=CD+rHSP70; 4=HFD; 5=HFD+AbGRP78; 6=HFD+AbHSP70; 7=DJB; 8=DJB+rGRP78; 9=DJB+rHSP70; 10=SHAM. **b**, db-RDA for Bray-Curtis dissimilarity distances of ASVs profiles, metabolic/inflammatory variables and microbial taxa that best explain the variation of gut microbiota composition in fecal samples from chow diet CD HFD fed rats treated with recombinant proteins (rHSP70, rGRP78) or blocking antibodies (AbHSP70, AbGRP78) (CD, n=3; CD+rHSP70, n=4; CD+rGRP78, n=4; HFD, n=8; HFD+AbHSP70, n=4; HFD+AbGRP78, n=5). The statistical model constrained 32.5% of the compositional variation ( $p\text{-value} = 0.001$ ). Arrows indicate variables significantly correlated with variation of fecal microbiota composition. ALT, alanine aminotransferase; AST, aspartate aminotransferase; LPS, lipopolysaccharides; Glucose\_120min, blood glucose 120 minutes after oral glucose challenge; VAT, visceral adipose tissue; SAT, subcutaneous adipose tissue. Group is a categorical variable that indicates control and treated samples as: 1=Chow; 2=CD+rGRP78; 3=CD+rHSP70; 4=HFD+AbGRP78; 5=HFD+AbHSP70; 6=HFD. **c**, Significant Spearman's correlations between abundance of fecal ASVs and metabolic/inflammatory variables. The red-blue color scale indicates the direction and intensity of Spearman's correlations, with red and blue showing positive and negative correlations, respectively. + $p < 0.05$ ; \* $p < 0.001$  (FDR adjusted).

**a**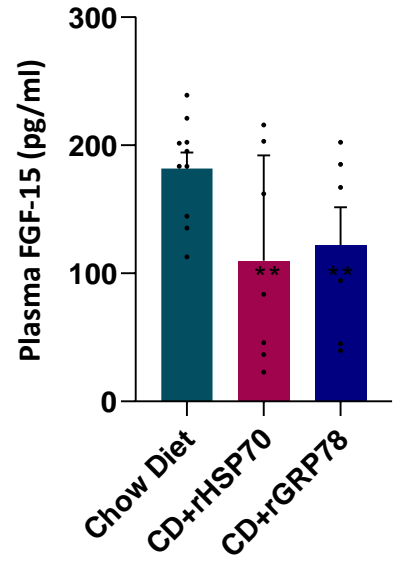**b**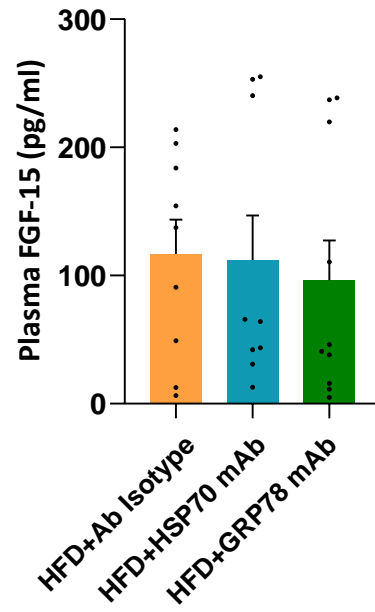**c**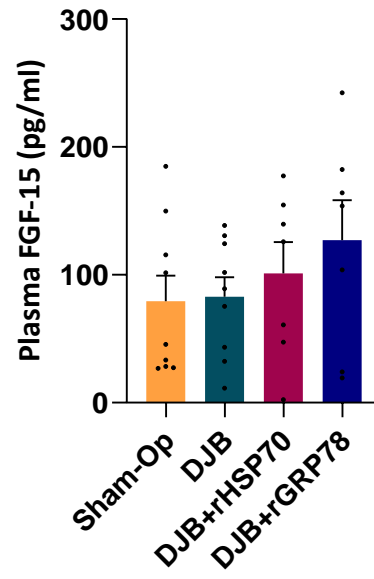

**Figure S14.**

**a-c**, Plasma levels of Fibroblast growth factor 15 (FGF15). Data are mean  $\pm$ SEM from n=10 biologically independent animals. Statistical significances were calculated by Kruskal–Wallis test with Dunnett’s correction for multiple comparisons. Source data are provided as a Source Data file.



### a Model Summary

|           |         |
|-----------|---------|
| Algorithm | TwoStep |
| Inputs    | 6       |
| Clusters  | 2       |

### Cluster Quality

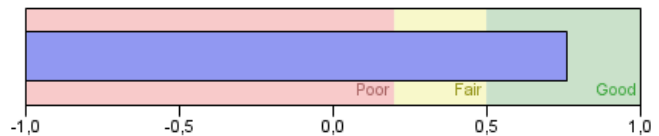

Silhouette measure of cohesion and separation

### Centroids

| Cluster  | GRP78  |                | HSP70  |                |
|----------|--------|----------------|--------|----------------|
|          | Mean   | Std. Deviation | Mean   | Std. Deviation |
| 1        | 48.24  | 33.85          | 70.60  | 24.58          |
| 2        | 637.86 | 367.61         | 295.84 | 99.99          |
| Combined | 377.33 | 402.45         | 196.31 | 135.83         |

### c

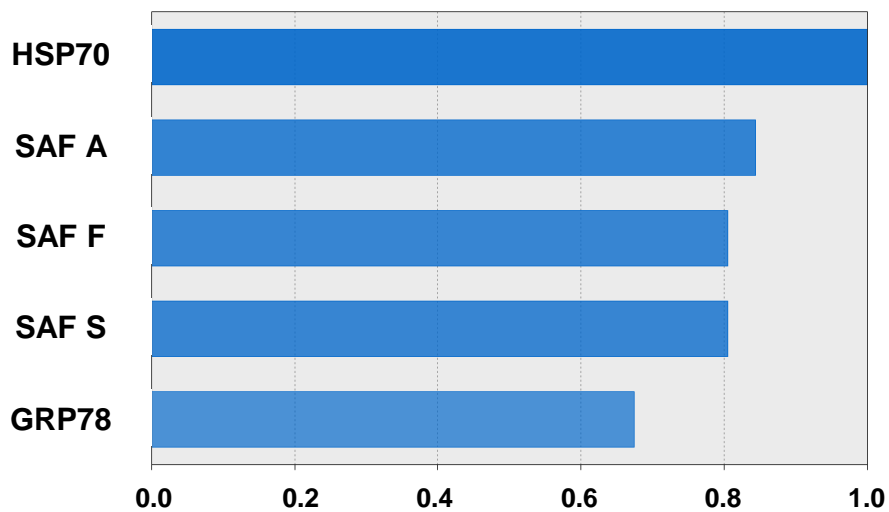

### b

### Clusters

#### Input (Predictor) Importance

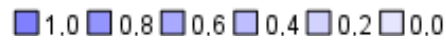

| Cluster Label | 2                                                                | 1                                                                |
|---------------|------------------------------------------------------------------|------------------------------------------------------------------|
| Description   |                                                                  |                                                                  |
| Size          | 55.8% (48)                                                       | 44.2% (38)                                                       |
| Inputs        | <p>HSP70</p> <p>SAF A</p> <p>SAF F</p> <p>SAF S</p> <p>GRP78</p> | <p>HSP70</p> <p>SAF A</p> <p>SAF F</p> <p>SAF S</p> <p>GRP78</p> |

#### Cluster Sizes

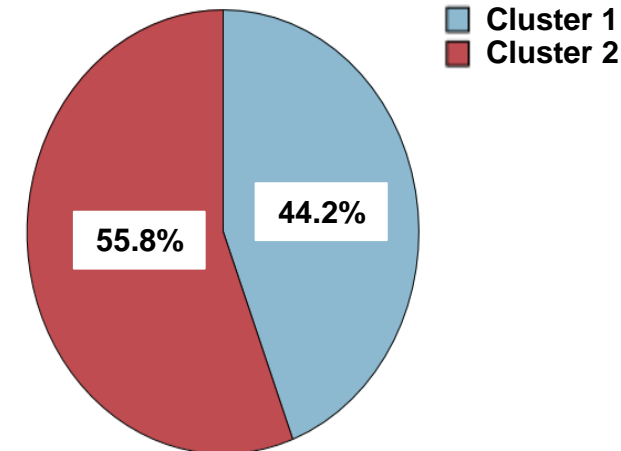

|                                                     |            |
|-----------------------------------------------------|------------|
| Size of Smallest Cluster                            | 38 (44,2%) |
| Size of Largest Cluster                             | 48 (55,8%) |
| Ratio of Sizes: Largest Cluster to Smallest Cluster | 1,26       |

### d

#### Cluster Comparison

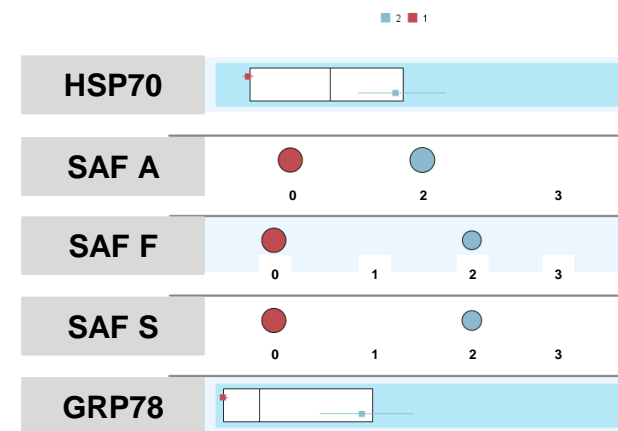

**Figure S15.**

**a**, Two-step partitioning cluster analysis with HSP70 and GRP78 as continuous variables and histological liver scores, i.e. SAF-S, SAF-A and SAF-F, as categorical variables. The quality of the cluster is good. The centroids values of the two clusters (subjects with NASH vs. healthy controls) for HSP70 and GRP78 are reported in the table. **b**, The cluster size (47 subjects with NASH and 39 healthy controls) shows that 1 HC was misclassified. The input importance shows that HSP70 and GRP78 are major predictors of NASH presence. **c**, Importance of HSP70, SAF-A, SAF-F, SAF-S and GRP78 as predictors of NASH presence. **d**, Comparison of cluster composition.

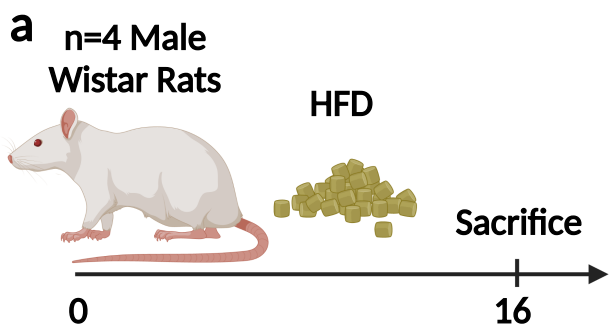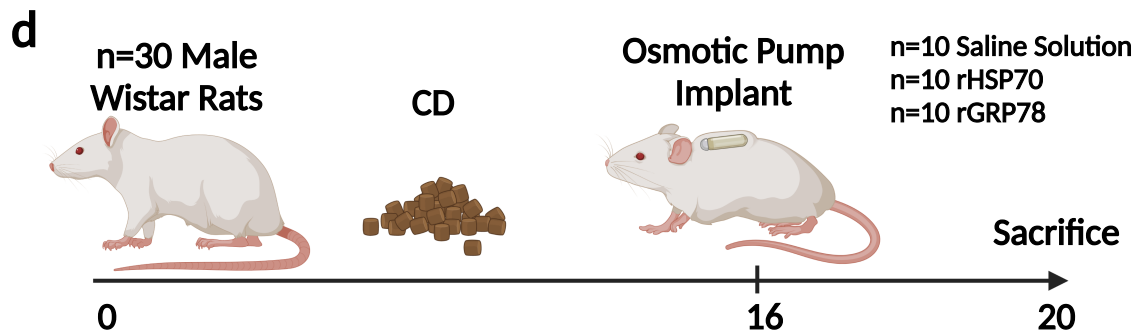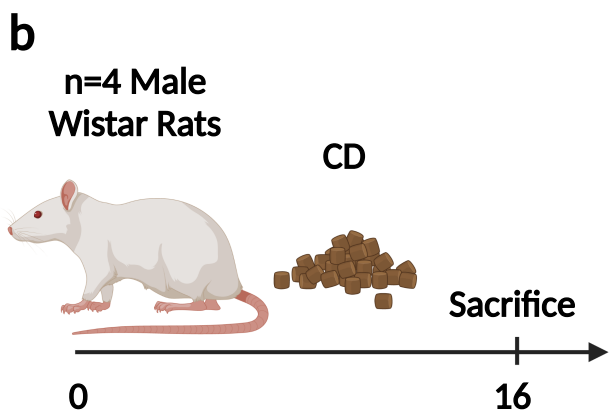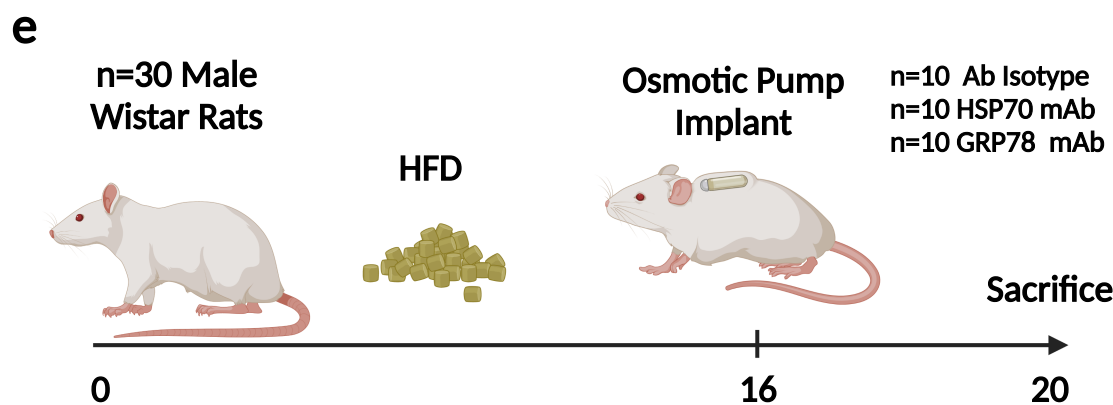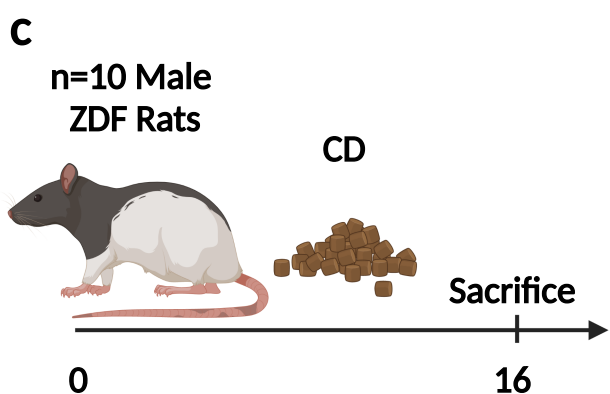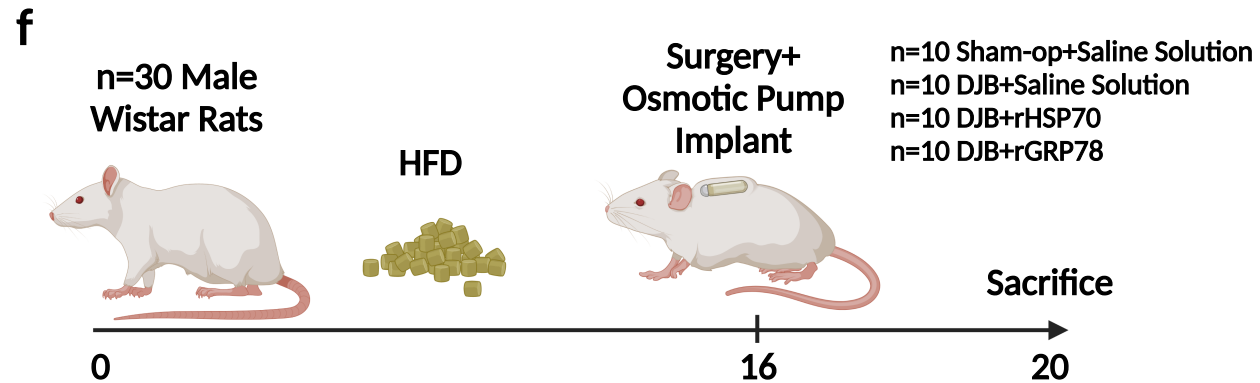

**Figure S16.**

**a-c**, Experimental design of the study involving dietary intervention. **d,e**, Experimental design of the study involving dietary intervention and infusion of recombinant protein or blocking monoclonal antibodies. **f**, Experimental design of the study including metabolic surgery and infusion of recombinant protein. Created with BioRender.com.

**a**

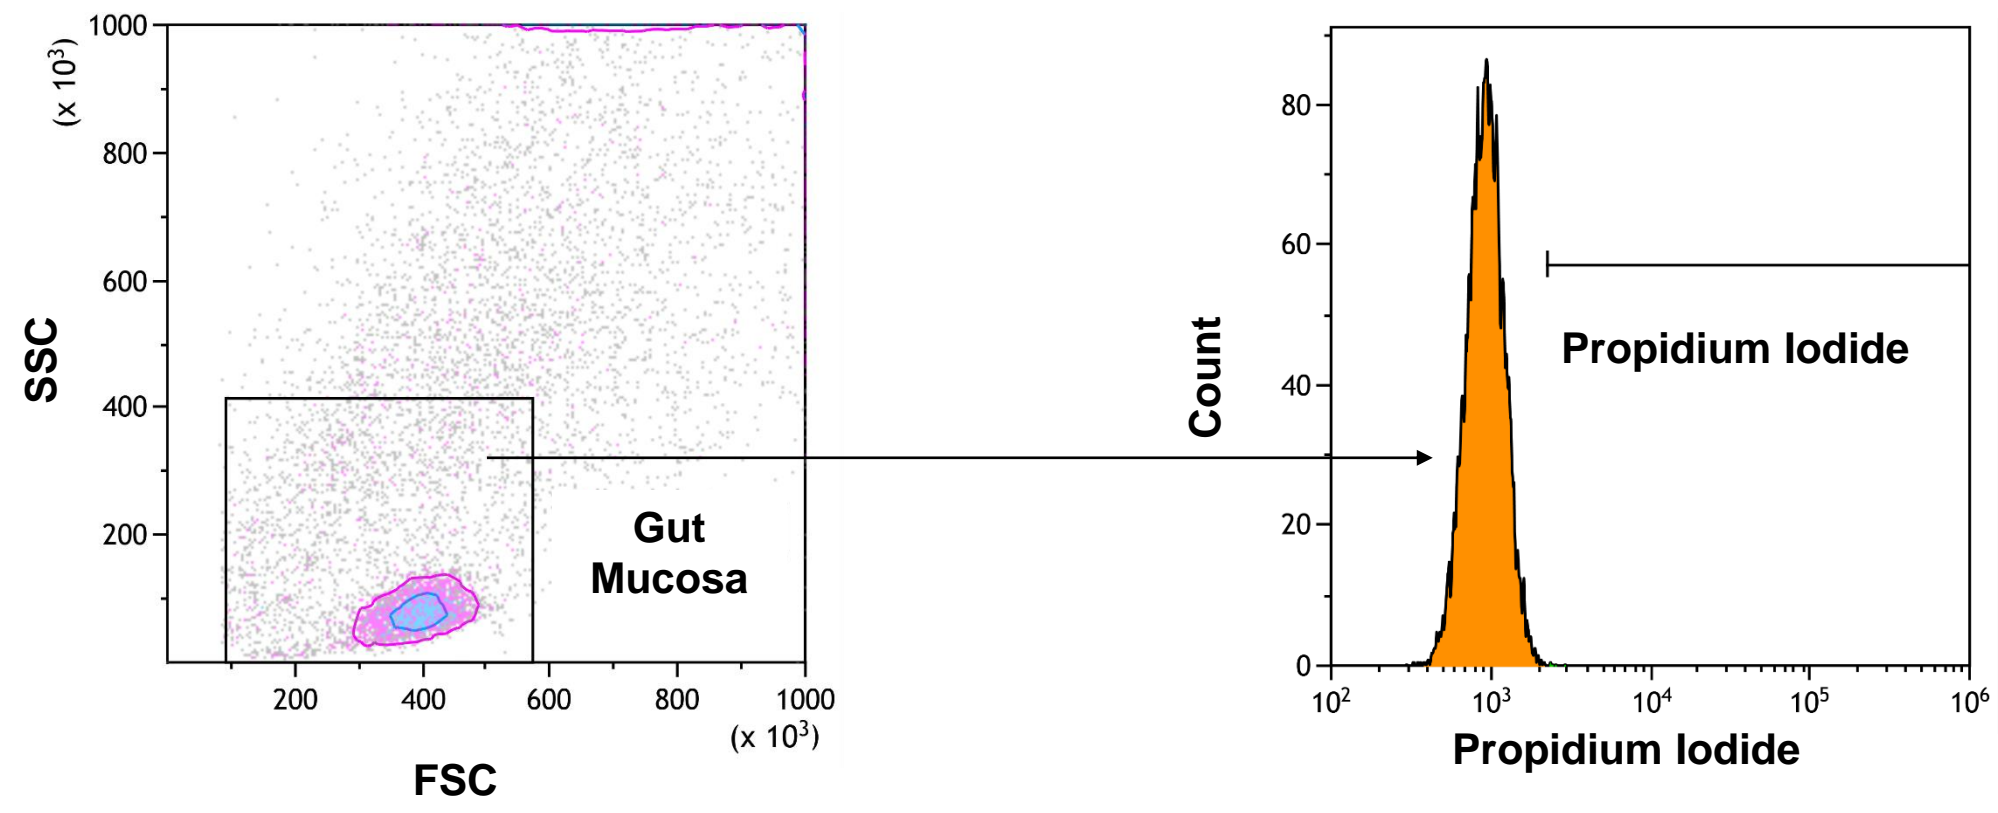

**b**

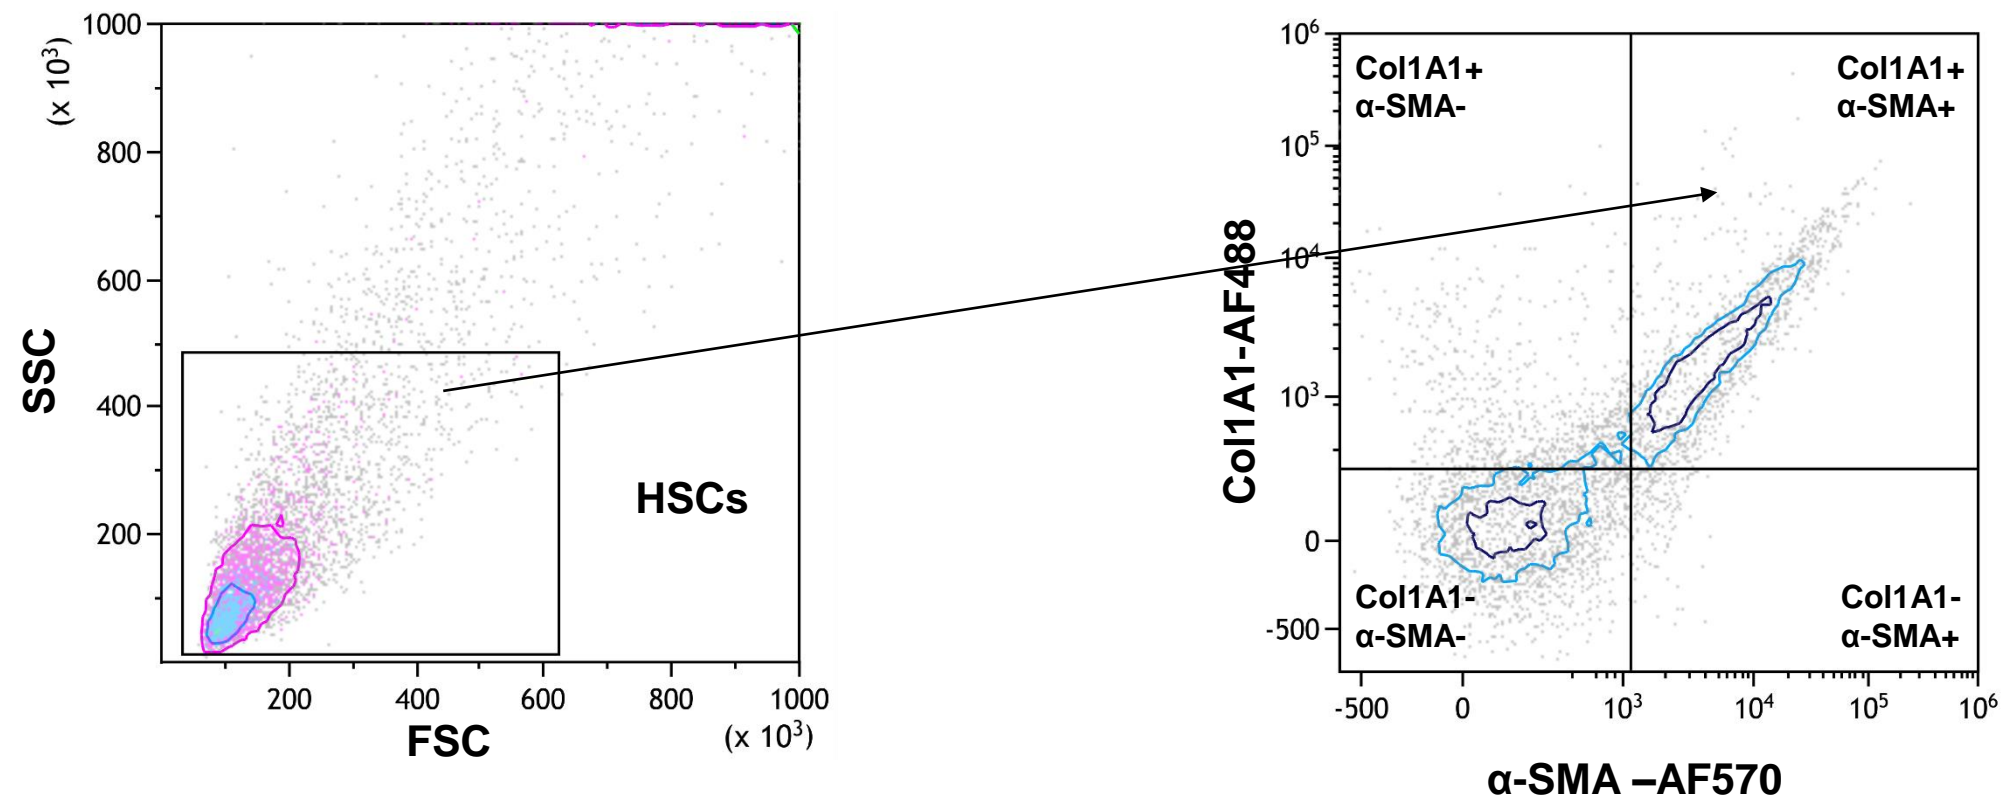

**Figure S17.**

**a**, Gating strategy of gut mucosa cell death using propidium iodide staining. **b**, Gating strategies of rat hepatic stellate cells (HSCs) stained with alpha-smooth muscle Actin ( $\alpha$ -SMA) and Collagen type I alpha 1 (COL1A1).

## SUPPLEMENTARY TABLES

**Table S1.** Recombinant and native HSP70 and GRP78 kinetics in rats

|                     | <b>A</b><br>(ng/ml·min <sup>-1</sup> ) | <b>K1</b><br>(l·min <sup>-1</sup> ) | <b>K2</b><br>(l·min <sup>-1</sup> ) | <b>Tm</b><br>(ng·min <sup>-1</sup> ) | <b>Km</b><br>(ng/ml) | <b>EV</b><br>(min) |
|---------------------|----------------------------------------|-------------------------------------|-------------------------------------|--------------------------------------|----------------------|--------------------|
| <b>rHSP70</b>       | 8.37±1.50                              | 0.034±0.006                         | 0.018±0.009                         | 0.031±0.004                          | 7.74±0.73            | 64.33±6.15         |
| <b>Native HSP70</b> | 7.95±1.69                              | 0.031±0.011                         | 0.010±0.002                         | 0.030±0.004                          | 8.94±0.12            | 68.33±12.78        |
| <b>rGRP78</b>       | 4.4±1.43                               | 0.009±0.003                         | 0.010±0.003                         | 0.017±0.005                          | 12.94±5.20           | 62.17±18.00        |
| <b>Native GRP78</b> | 2.86±0.68                              | 0.017±0.008                         | 0.009±0.003                         | 0.029±0.009                          | 9.72±1.06            | 60.50±11.00        |

Data are expressed as mean ± SEM.

A (ng/ml·min<sup>-1</sup>) is the maximal inflow rate of the protein; K1 and K2 are the rates (1/min<sup>-1</sup>) of inflow increase and decrease; Tm (ng/min) and Km (ng/mL) are the parameters of the Michaelis-Menten function.

**Table S2.** Insulin sensitivity and insulin secretion, measured by the oral glucose minimal model

|                     | <b>SG</b> ×10 <sup>2</sup><br>(min <sup>-1</sup> ) | <b>p</b> ×10 <sup>2</sup><br>(min <sup>-1</sup> ) | <b>SI</b> ×10 <sup>4</sup><br>(pM <sup>-1</sup> min <sup>-1</sup> ) | <b>Volume</b><br>(mL)            | <b>Φ</b> ×10 <sup>9</sup><br>(min <sup>-1</sup> ) | <b>AUCISR</b><br>(nmoles)        |
|---------------------|----------------------------------------------------|---------------------------------------------------|---------------------------------------------------------------------|----------------------------------|---------------------------------------------------|----------------------------------|
| <b>Chow Diet</b>    | 4.09±0.12                                          | 0.15±0.005                                        | 0.82±0.04                                                           | 72.22±0.98                       | 2.99±0.49                                         | 1.35±0.15                        |
| <b>CD+rHSP70</b>    | 4.06±0.12                                          | 0.24±0.02                                         | 0.14±0.02<br><b>P&lt;0.0001</b>                                     | 70.86±0.98                       | 22.33±2.83<br><b>P&lt;0.0001</b>                  | 22.65±2.68<br><b>P&lt;0.0001</b> |
| <b>CD+rGRP78</b>    | 3.80±0.13                                          | 0.17±0.02                                         | 0.16±0.02<br><b>P&lt;0.0001</b>                                     | 81.14±2.18<br><b>P=0.049</b>     | 22.81±4.38<br><b>P&lt;0.0001</b>                  | 20.94±2.46<br><b>P&lt;0.0001</b> |
| <b>HFD+ Isotype</b> | 3.86±0.12                                          | 0.17±0.03                                         | 0.15±0.03                                                           | 96.33±1.42                       | 22.35±2.63                                        | 38.41±3.64                       |
| <b>HFD+AbHSP70</b>  | 3.91±0.22                                          | 0.17±0.04                                         | 0.76±0.02<br><b>P&lt;0.0001</b>                                     | 69.20±0.44<br><b>P&lt;0.0001</b> | 3.92±0.69<br><b>P&lt;0.0001</b>                   | 7.83±1.04<br><b>P&lt;0.0001</b>  |
| <b>HFD+AbGRP78</b>  | 3.96±0.15                                          | 0.18±0.03                                         | 0.93±0.04<br><b>P&lt;0.0001</b>                                     | 68.60±0.45<br><b>P&lt;0.0001</b> | 2.84±0.57<br><b>P&lt;0.0001</b>                   | 7.37±0.97<br><b>P&lt;0.0001</b>  |
| <b>Sham-Op</b>      | 4.09±0.14                                          | 0.33±0.07                                         | 0.13±0.005                                                          | 106.80±1.50                      | 24.86±2.30                                        | 40.14±4.73                       |
| <b>DJB</b>          | 4.09±0.13                                          | 0.16±0.02                                         | 0.50±0.04<br><b>P&lt;0.0001</b>                                     | 72.41±2.82<br><b>P&lt;0.0001</b> | 2.99±0.48<br><b>P&lt;0.0001</b>                   | 1.68±0.40<br><b>P&lt;0.0001</b>  |
| <b>DJB+rHSP70</b>   | 4.35±0.16                                          | 0.15±0.02                                         | 0.10±0.01<br><b>P&lt;0.0001</b>                                     | 81.65±1.55<br><b>P=0.0027</b>    | 22.85±2.62<br><b>P&lt;0.0001</b>                  | 20.82±1.23<br><b>P&lt;0.0001</b> |
| <b>DJB+rGRP78</b>   | 4.09±0.14                                          | 0.16±0.01                                         | 0.13±0.005<br><b>P&lt;0.0001</b>                                    | 80.14±0.76<br><b>P=0.0021</b>    | 20.34±2.30<br><b>P&lt;0.0001</b>                  | 20.94±2.46<br><b>P&lt;0.0001</b> |

Data are expressed as mean ± SEM.

SG, glucose effectiveness; p, minimal model parameter; SI, insulin sensitivity; Volume, glucose volume of distribution; Φ, total β-cell glucose sensitivity; AUCISR, incremental area under the curve of the insulin secretion rate over basal; CD, Chow Diet; HFD, High Fat Diet; Sham-op, Sham-operation; DJB, Duodenal-jejunal Bypass. HSP70, Heat Shock Protein 70; GRP78, Glucose-related Protein 78.



**Table S3.** Anthropometric and metabolic data of people with NASH and healthy controls.

|                                        | People With<br>NASH<br>(n=47) | Healthy<br>Controls<br>(n=39) | pValue  |
|----------------------------------------|-------------------------------|-------------------------------|---------|
| Age                                    | 49.85±1.33                    | 41.97±1.38                    | NS      |
| Weight                                 | 123.5±3.21                    | 63.95±1.75                    | <0.0001 |
| BMI                                    | 43.65±0.89                    | 21.62±0.26                    | <0.0001 |
| Plasma Glucose (mg/dl)                 | 105.2±3.96                    | 80.16±1.29                    | <0.0001 |
| Plasma Insulin (mIU/l)                 | 25.08±3.07                    | 8.74±0.30                     | <0.0001 |
| HOMA-IR                                | 6.49±0.85                     | 1.75±0.080                    | <0.0001 |
| Cholesterol (mg/dl)                    | 192.1±4.27                    | 173.2±2.70                    | 0.0007  |
| HDL (mg/dl)                            | 54.64±3.59                    | 67.26±1.77                    | 0.0044  |
| *LDL (equation)                        | 107.9±5.87                    | 99.08±2.14                    | NS      |
| Triglycerides(mg/dl)                   | 145.3±8.98                    | 85.16±3.87                    | <0.0001 |
| ALT (IU/l)                             | 24.89±1.25                    | 16.45±0.86                    | <0.0001 |
| AST (IU/l)                             | 33.70±2.49                    | 17.03±0.99                    | <0.0001 |
| HbA1c (mmol/mol)                       | 43.09±1.27                    | 25.34±0.42                    | <0.0001 |
| NAFLD Activity Score (NAS)             | 3.88±0.11                     | 0.00±0.00                     | <0.0001 |
| SAF S                                  | 1.73±0.093                    | 0.00±0.00                     | <0.0001 |
| SAF A                                  | 2.17±0.054                    | 0.00±0.00                     | <0.0001 |
| SAF F                                  | 1.69±0.095                    | 0.00±0.00                     | <0.0001 |
| Metavir                                | 1.04±0.073                    | 0.00±0.00                     | <0.0001 |
| †NAFLD Fibrosis Score (Formula)        | 0.029±0.13                    | -2.08±0.17                    | <0.0001 |
| ‡AST to Platelet Ratio Index (Formula) | 0.26±0.022                    | 0.19±0.011                    | 0.015   |
| Plasma HSP70 (ng/ml)                   | 282.90±11.74                  | 75.87±36.20                   | <0.0001 |
| Plasma GRP78 (ng/ml)                   | 631.60±80.89                  | 61.06±11.24                   | <0.0001 |

Data are expressed as mean±SE.

\*LDL-cholesterol (mg/dl) = Total Cholesterol (mg/dl) – HDL-cholesterol (mg/dl) – Triglycerides (mg/dl)/5.

†NAFLD fibrosis score =  $-1.675 + 0.037 \times \text{age (years)} + 0.094 \times \text{BMI (kg/m}^2\text{)} + 1.13 \times \text{IFG/diabetes (yes = 1, no = 0)} + 0.99 \times \text{AST/ALT ratio} - 0.013 \times \text{platelet count (}\times 10^9\text{/l)} - 0.66 \times \text{albumin (g/dl)}$ .

‡AST to Platelet Ratio Index =  $[(\text{AST (UI/L)}/\text{upper limit of the normal AST range}) \times 100]/\text{Platelet Count (}\times 10^9\text{/l)}$ .

**Table S4.** Anthropometric and metabolic data of people before and after Vertical Sleeve Gastrectomy (VSG) or Low-Fat Diet (LFD).

|                               | <b>Before VSG<br/>(n=10)</b> | <b>After VSG<br/>(n=10)</b> | <b>pValue</b> | <b>Before LFD<br/>(n=10)</b> | <b>After LFD<br/>(n=10)</b> | <b>pValue</b> |
|-------------------------------|------------------------------|-----------------------------|---------------|------------------------------|-----------------------------|---------------|
| <b>Age (years)</b>            | 49.60±2.47                   | 50.60±2.47                  | NS            | 54.80±3.35                   | 55.80±3.35                  | NS            |
| <b>Weight (kg)</b>            | 128.10±6.31                  | 85.23±4.38                  | <0.0001       | 117.10±7.13                  | 101.7±7.58                  | 0.0003        |
| <b>BMI (kg/m<sup>2</sup>)</b> | 44.58±1.33                   | 29.70±0.90                  | <0.0001       | 39.48±2.07                   | 35.27±2.28                  | 0.0001        |
| <b>Plasma Glucose (mg/dl)</b> | 107.60±9.48                  | 77.30±2.97                  | 0.013         | 106.0±6.34                   | 89.70±4.90                  | NS            |
| <b>Plasma Insulin (mIU/l)</b> | 33.84±8.28                   | 7.22±1.15                   | 0.008         | 23.56±3.51                   | 7.02±0.64                   | <0.0001       |
| <b>HOMA-IR</b>                | 9.91±3.18                    | 1.39±0.22                   | 0.024         | 5.99±0.80                    | 1.55±0.15                   | <0.0001       |
| <b>Cholesterol (mg/dl)</b>    | 186.30±9.26                  | 15.80±8.74                  | 0.015         | 191.70±7.72                  | 177.90±13.96                | NS            |
| <b>HDL (mg/dl)</b>            | 43.30±4.28                   | 52.20±3.54                  | 0.0492        | 41.80±2.19                   | 48.00±3.04                  | NS            |
| <b>*LDL (equation)</b>        | 114.30±8.14                  | 90.58±6.36                  | 0.0137        | 116.20±6.35                  | 99.40±32.77                 | NS            |
| <b>Triglycerides(mg/dl)</b>   | 144.4±17.12                  | 69.30±8.08                  | 0.0027        | 167.80±23.78                 | 60.63±20.21                 | NS            |
| <b>ALT (IU/l)</b>             | 33.70±8.17                   | 14.40±1.43                  | 0.031         | 39.80±9.19                   | 21.20±3.35                  | NS            |
| <b>AST (IU/l)</b>             | 23.30±3.66                   | 17.30±0.99                  | NS            | 28.40±4.12                   | 20.00±1.76                  | NS            |
| <b>HbA1c (mmol/mol)</b>       | 34.16±4.87                   | 34.90±0.62                  | NS            | 42.89±3.58                   | 37.38±2.70                  | NS            |
| <b>Serum HSP70 (ng/ml)</b>    | 347.00±16.66                 | 212.60±5.90                 | <0.0001       | 298.50±17.86                 | 70.74±5.57                  | <0.0001       |
| <b>Serum GRP78 (ng/ml)</b>    | 822.20±81.57                 | 423.8±27.15                 | 0.0004        | 749.50±99.04                 | 276.90±41.02                | 0.0036        |

Data are expressed as mean±SE.

\*LDL-cholesterol (mg/dl) = Total Cholesterol (mg/dl) – HDL-cholesterol (mg/dl) – Triglycerides (mg/dl)/5.

**Table S5.** HSP70 and GRP78 kinetics after a mixed meal

|                                             | <b>A</b><br>(ng/ml·min <sup>-1</sup> ) | <b>K1</b><br>(l·min <sup>-1</sup> ) | <b>K2</b><br>(l·min <sup>-1</sup> ) | <b>Tm</b><br>(ng·min <sup>-1</sup> ) | <b>Km</b><br>(ng/ml) | <b>EV</b><br>(min) |
|---------------------------------------------|----------------------------------------|-------------------------------------|-------------------------------------|--------------------------------------|----------------------|--------------------|
| <b>HSP70</b><br>(Healthy Participant)       | 110.80±27.78                           | 0.031±0.009                         | 0.020±0.004                         | 0.068±0.022                          | 47.62±11.40          | 49.30±16.49        |
| <b>HSP70</b><br>(Participants With Obesity) | 298.40±34.89                           | 0.053±0.006                         | 0.043±0.007                         | 0.094±0.049                          | 14.00±2.45           | 32.20±7.85         |
| <b>GRP78</b><br>(Healthy Participants)      | 94.40±10.36                            | 0.036±0.005                         | 0.035±0.004                         | 0.039±0.002                          | 10.60±0.24           | 22.80±4.90         |
| <b>GRP78</b><br>(Participants With Obesity) | 370.00±46.58                           | 0.034±0.004                         | 0.04±0.013                          | 0.057±0.089                          | 60.70±4.38           | 20.40±2.66         |

Data are expressed as mean ± SEM.

A (ng/ml·min<sup>-1</sup>) is the maximal inflow rate of the protein; K1 and K2 are the rates (1/min) of inflow increase and decrease; Tm (ng/min) and Km (ng/mL) are the parameters of the Michaelis-Menten function.

**Table S6.** Primer sequences used in qRT-PCR

| Gene                                           | Primer sequence (5'to 3') |
|------------------------------------------------|---------------------------|
| Phosphoenolpyruvate carboxykinase (Pck)        | ATGACAACCTGCTGGTTGGCT     |
|                                                | CCACCACGTAGGGTGAATCC      |
| Glucose 6-phosphatase (G6Pc)                   | ACAGGTCCAGGAAGTCCATCT     |
|                                                | GCATGCCACCAATTACTCCAAG    |
| Glucokinase (Gck)                              | AGTTGTTGACTCTGGGCACC      |
|                                                | TTCATGTGCCCGTTGTGAGT      |
| Pyruvate kinase (Pk)                           | CTTCCCCTTGCTCTACCGTG      |
|                                                | ACCACGGAGCTTTCCACTTTC     |
| Interleukin 1 $\beta$ (IL1 $\beta$ )           | TCCAGTCAGGCTTCTTGTG       |
|                                                | AGGTCATTCTCCTCACTGTCG     |
| Interleukin 6 (IL6)                            | GCCCACCAGGAACGAAAGTC      |
|                                                | TGGCTGGAAGTCTCTTGCGG      |
| Tumor Necrosis Factor $\alpha$ (TNF $\alpha$ ) | CGTCGTAGCAAACCACCAAG      |
|                                                | TGGACCCAGAGCCACAATTC      |
| Alpha-smooth muscle actin (Acta)               | TTCCTTCGTGACTACTGCTGAG    |
|                                                | GAACTGAAGGCGCTGATCCA      |
| Collagen type I $\alpha$ 1 (Colla1)            | GTACATCAGCCCAAACCCCA      |
|                                                | TCGCTTCCATACTCGAACTGG     |
| Transforming growth factor $\beta$ 1 (Tgfb1)   | GCTGAACCAAGGAGACGGAA      |
|                                                | CCACGTAGTAGACGATGGGC      |
| Acetyl-CoA Carboxylase (Acc1)                  | ATTGGGGCTTACCTTGTCCG      |
|                                                | CCACGGTTCGGGTTTCTACA      |
| Fatty acid synthase (Fasn)                     | GAATCCGCACAGGCTACCAA      |
|                                                | CTGGGCTTACCATCACCAT       |
| Stearoyl-CoA desaturase 1 (Scd1)               | CCACAACCTACCATCACGCCT     |
|                                                | CAGGAACTCAGAAGCCCAGAA     |
| Diglyceride acyltransferase (Dgat)             | AGCAGGAGTAGGCCCCATAG      |
|                                                | ATTGGGGCTTACCTTGTCCG      |
| Occludin (Ocln)                                | AGCAACGCGGCTAGGG          |
|                                                | GCAGACACATTTTTAACCCACTC   |
| Haptoglobin (Zon1)                             | ATGCCACAGACATTGAAGATGAC   |
|                                                | CTCGGGGTGGAGAACTACCT      |
| $\beta$ 2-microglobulin                        | GACCGTGATCTTTCTGGTGCT     |
|                                                | ACACTTGAATTTGGGGAGTTTTCTG |

Primer sequences used for gene expression analysis by qRT-PCR.

**Table S7. Quantitative Real-Time PCR**

| Gene   | Chow Diet   | CD+rHSP70     | CD+rGRP78     | pValue           |
|--------|-------------|---------------|---------------|------------------|
| PEPCK  | 5.61±1.86   | 20.78±2.84    | 21.07±3.07    | †=0.041; ‡=0.014 |
| G6Pc   | 2.69±0.51   | 21.51±7.14    | 20.66±4.22    | †=0.033; ‡=0.018 |
| GCK    | 33.89±10.19 | 3.42±0.88     | 3.45±0.84     | †=0.027; ‡=0.022 |
| PK     | 21.46±3.72  | 3.26±0.62     | 3.42±0.60     | †=0.014; ‡=0.014 |
| IL1β   | 1.81±0.17   | 13.58±1.62    | 11.60±3.07    | †=0.011; ‡=0.048 |
| IL6    | 20.94±5.95  | 410.40±187.3  | 458.10±139.80 | †=0.022; ‡=0.027 |
| TNFα   | 2.46±0.41   | 11.02±4.76    | 9.73±3.07     | †=0.033; ‡=0.018 |
| α-SMA  | 1.35±0.12   | 5.44±0.82     | 5.07±0.55     | †=0.014; ‡=0.040 |
| Col1a1 | 5.83±1.30   | 25.60±6.10    | 19.15±2.48    | †=0.014; ‡=0.040 |
| ACC1   | 45.93±14.49 | 342.70±147.60 | 402.20±120.10 | †=0.040; ‡=0.014 |
| FASN   | 2.89±0.65   | 12.88±2.06    | 9.72±1.18     | †=0.012; ‡=0.047 |
| DGAT   | 1.42±0.17   | 38.39±19.09   | 32.06±10.31   | †=0.027; ‡=0.022 |
| SCD1   | 47.77±28.38 | 2100±1008     | 2185±1120     | †=0.014; ‡=0.040 |
| OCLN   | 0.79±0.02   | 0.11±0.03     | 0.15±0.04     | †=0.012; ‡=0.046 |
| ZON1   | 0.62±0.07   | 0.12±0.04     | 0.11±0.03     | †=0.017; ‡=0.033 |

†= pValue between Chow Diet and CD+rHSP70; ‡= pValue between Chow Diet and CD+rGRP78

| Gene   | HFD+ Isotype | HFD+AbHSP70 | HFD+AbGRP78 | pValue             |
|--------|--------------|-------------|-------------|--------------------|
| PEPCK  | 24.65±3.19   | 5.17±1.01   | 8.77±1.91   | †=0.0005; ‡=0.0005 |
| G6Pc   | 18.64±6.34   | 2.54±0.46   | 2.29±0.50   | †=0.032; ‡=0.017   |
| GCK    | 4.54±1.12    | 27.71±7.38  | 30.36±7.15  | †=0.027; ‡=0.022   |
| PK     | 3.88±0.52    | 15.89±2.59  | 17.70±2.99  | †=0.0062; ‡=0.0034 |
| IL1β   | 10.13±2.30   | 1.75±0.20   | 2.89±0.06   | †=0.040; ‡=0.012   |
| IL6    | 461.4±125.10 | 13.94±6.48  | 10.64±3.67  | †=0.033; ‡=0.018   |
| TNFα   | 17.22±5.61   | 2.93±0.40   | 3.33±0.36   | †=0.022; ‡=0.027   |
| α-SMA  | 5.64±0.52    | 1.99±0.22   | 1.53±0.24   | †<0.0001; ‡<0.0001 |
| Col1a1 | 37.84±6.04   | 8.33±1.65   | 8.18±1.93   | †=0.022; ‡=0.027   |
| ACC1   | 278.70±97.76 | 57.74±12.96 | 65.14±14.92 | †=0.014; ‡=0.040   |
| FASN   | 9.45±0.39    | 3.68±0.59   | 4.27±0.93   | †=0.0002; ‡=0.0003 |
| DGAT   | 37.00±19.47  | 1.30±0.09   | 1.20±0.10   | †=0.048; ‡=0.011   |
| SCD1   | 1085±292.40  | 30.80±3.82  | 15.77±7.66  | †=0.0023; ‡=0.0023 |
| OCLN   | 0.14±0.04    | 0.85±0.05   | 0.81±0.06   | †=0.022; ‡=0.039   |
| ZON1   | 0.12±0.01    | 0.53±0.09   | 0.55±0.10   | †=0.006; ‡=0.039   |

†= pValue between High Fat Diet and HFD+AbHSP70 ; ‡= pValue between High Fat Diet and HFD+AbGRP78

| Gene   | Sham-Op       | DJB         | CD+rHSP70    | CD+rGRP78    | pValue                     |
|--------|---------------|-------------|--------------|--------------|----------------------------|
| PEPCK  | 49.31±8.05    | 12.17±3.51  | 56.38±12.21  | 51.81±10.82  | †=0.016; ‡=0.023; §=0.031  |
| G6Pc   | 45.77±14.26   | 3.14±0.69   | 25.12±4.26   | 26.99±7.03   | †=0.0048; ‡=0.042; §=0.048 |
| GCK    | 4.60±1.48     | 37.20±10.73 | 5.11±1.40    | 4.66±1.24    | †=0.048; ‡=0.026; §=0.008  |
| PK     | 3.38±0.93     | 17.44±4.78  | 3.27±0.88    | 3.70±0.96    | †=0.015; ‡=0.015; §=0.048  |
| IL1β   | 6.68±1.36     | 2.04±0.55   | 6.56±1.26    | 6.33±1.13    | †=0.016; ‡=0.023; §=0.031  |
| IL6    | 254.10±83.88  | 12.58±5.83  | 235.50±71.92 | 234.40±62.42 | †=0.026; ‡=0.014; §=0.023  |
| TNFα   | 10.31±2.70    | 2.90±0.39   | 9.83±2.55    | 8.55±1.36    | †=0.016; ‡=0.036; §=0.019  |
| α-SMA  | 22.24±3.06    | 3.53±0.47   | 19.50±3.30   | 16.76±3.58   | †=0.0058; ‡=0.036; §=0.048 |
| Col1a1 | 70.06±6.30    | 32.46±3.46  | 70.57±4.75   | 77.90±8.02   | †=0.0048; ‡=0.026; §=0.008 |
| ACC1   | 475.40±197.60 | 55.35±15.13 | 281.80±75.79 | 395.60±142.0 | †=0.014; ‡=0.042; §=0.019  |
| FASN   | 13.69±3.26    | 3.25±0.80   | 14.72±3.40   | 10.57±1.10   | †=0.023; ‡=0.012; §=0.042  |
| DGAT   | 25.77±7.78    | 1.66±0.21   | 19.71±5.93   | 20.33±4.59   | †=0.023; ‡=0.049; §=0.036  |
| SCD1   | 4652±2720     | 49.25±7.65  | 4450±2710    | 4360±1339    | †=0.036; ‡=0.016; §=0.019  |
| OCLN   | 0.11±0.007    | 0.84±0.02   | 0.15±0.01    | 0.015±0.009  | †=0.0004; ‡=0.032; §=0.032 |
| ZON1   | 45.77±14.26   | 3.14±0.69   | 25.12±4.26   | 26.99±7.03   | †=0.0005; ‡=0.032; §=0.032 |

†= pValue between SHAM and DJB ; ‡= pValue between DJB and DJB+rHSP70; §= pValue between DJB and DJB+rGRP78

Data are mean  $\pm$  SEM of n=10 rats per group.

Upper Part: gene expression analysis of rats under Chow Diet and Chow Diet combined with continuous infusion of recombinant proteins.

Middle Part: gene expression analysis of rats under High Fat Diet and HFD combined with continuous infusion of blocking antibodies.

Lower Part: gene expression analysis of rats after SHAM, DJB and DJB combined with continuous infusion of recombinant proteins.

Abbreviations: PEPCCK1, Phosphoenolpyruvate carboxykinase 1; G6Pase, Glucose 6-phosphatase; GCK, Glucokinase; PK, Pyruvate kinase; IL1 $\beta$ , Interleukin 1 $\beta$ ; IL6, Interleukin 6; TNF $\alpha$ , Tumor Necrosis Factor  $\alpha$ ;  $\alpha$ -SMA, Alpha-smooth muscle actin; Col1a1, Collagen type I  $\alpha$ 1; ACC1, acetyl-CoA carboxylase; FASN, Fatty acid synthase; SCD1, Stearoyl-CoA desaturase 1; DGAT, Diglyceride acyltransferase; OCLN, Occludin; ZON1, Zonulin 1. CD, Chow Diet; HFD, High Fat Diet; Sham-op, Sham-operation; DJB, Duodenal-jejunal Bypass. HSP70, Heat Shock Protein 70; GRP78, Glucose-related Protein 78.

**Table S8.** Quantitative Real-Time PCR of in vitro experiments

| Gene                                              | Untreated   | +rHSP70       | TAK242+rHSP70                 | +rGRP78       | TAK242+rGRP78                 |
|---------------------------------------------------|-------------|---------------|-------------------------------|---------------|-------------------------------|
| <b>Rat Primary Hepatocytes Cultures</b>           |             |               |                               |               |                               |
| <b>CD36</b>                                       | 2.01±0.25   | 20.60±6.54    | 2.20±0.02<br><b>P=0.035</b>   | 18.13±8.00    | 1.23±0.13<br><b>P=0.035</b>   |
| <b>ACC1</b>                                       | 3.56±0.72   | 84.68±25.44   | 2.58±0.63<br><b>P=0.036</b>   | 46.05±20.39   | 2.67±0.74<br><b>P=0.036</b>   |
| <b>FASN</b>                                       | 2.43±0.46   | 65.80±11.08   | 3.87±0.18<br><b>P=0.036</b>   | 49.38±12.98   | 1.91±0.34<br><b>P=0.036</b>   |
| <b>DGAT</b>                                       | 1.53±0.13   | 3.78±0.67     | 1.54±0.27<br><b>P=0.036</b>   | 3.22±0.39     | 1.70±0.13<br><b>P=0.036</b>   |
| <b>SCD1</b>                                       | 75.17±14.82 | 1230.00±371.8 | 104.00±3.58<br><b>P=0.036</b> | 964.60±294.60 | 77.67±12.22<br><b>P=0.036</b> |
| <b>Rat Primary Colon epithelial cell Cultures</b> |             |               |                               |               |                               |
| <b>IL1β</b>                                       | 32.90±13.48 | 161.50±49.08  | 26.00±14.06<br><b>P=0.029</b> | 131.5±35.20   | 33.79±17.10<br><b>P=0.047</b> |
| <b>IL6</b>                                        | 0.94±0.09   | 3.24±0.54     | 1.31±0.12<br><b>P=0.029</b>   | 2.79±0.32     | 1.51±0.15<br><b>P=0.029</b>   |
| <b>TNFα</b>                                       | 2.80±0.47   | 10.55±0.88    | 3.84±0.19<br><b>P=0.029</b>   | 12.37±1.28    | 3.96±1.32<br><b>P=0.029</b>   |
| <b>OCLN</b>                                       | 0.11±0.007  | 0.84±0.02     | 0.15±0.01                     | 0.015±0.009   | 131.5±35.20<br><b>P=0.029</b> |
| <b>ZON1</b>                                       | 2.71±0.22   | 10.09±0.04    | 2.62±0.19<br><b>P=0.029</b>   | 1.40±0.1      | 2.67±0.17<br><b>P=0.029</b>   |

Data are mean ± SEM of n=5 independent experiments.

Upper Part: gene expression analysis of rat primary hepatocytes cultures incubated with or without recombinant proteins (15 ng/ml of HSP70 and 3 ng/ml of GRP78) and in the presence or absence of TAK-242 (200nM)

Lower Part: gene expression analysis of rat primary colon epithelial cell cultures incubated with or without recombinant proteins (15 ng/ml of HSP70 and 3 ng/ml of GRP78) and in the presence or absence of TAK-242 (200nM)

Abbreviations: IL1β, Interleukin 1β; IL6, Interleukin 6; TNFα, Tumor Necrosis Factor α; ACC1, acetyl-CoA carboxylase; FASN, Fatty acid synthase; SCD1, Stearoyl-CoA desaturase 1; DGAT, Diglyceride acyltransferase; OCLN, Occludin; ZON1, Zonulin 1; HSP70, Heat Shock Protein 70; GRP78, Glucose-related Protein 78.
